# Supplementary material for: Original study on mathematical models for analysis of cellulose water content from absorbance/wavenumber shifts in ATR FT-IR spectrum
Source: Research Square preprint supplement (doi:10.21203/rs.3.rs-1860641/v2), 2022-11-02
Supplement: Supplementary file 1 [file 342c60a810738f351f23ef40.xlsx]

## Sheet: Data
No.	Wavenumber [1/cm] (X)																Absorbance [-] (Y)																Water content derived from Karl-Fischer titration [wt%] (Z)
	1	2	3	4	5	6	7	8	9	10	11	12	13	14	15	16	1	2	3	4	5	6	7	8	9	10	11	12	13	14	15	16
1.	434.387	559.255	664.357	895.773	1031.73	1055.84	1105.49	1160.94	1200.47	1315.21	1333.54	1365.84	1426.1	1640.64	2893.66	3330.46	0.0945204	0.136286	0.0941391	0.040321	0.217365	0.212933	0.11799	0.0731218	0.0232596	0.0397449	0.0356871	0.0323352	0.0243324	0.0062991	0.0210931	0.0428282	0.26
2.	437.762	559.737	664.357	896.737	1031.25	1055.35	1104.53	1160.94	1199.99	1314.73	1332.57	1369.69	1426.1	1640.64	2891.74	3330.46	0.0968873	0.139463	0.0957089	0.0401117	0.20818	0.201857	0.113239	0.0695854	0.0198375	0.039311	0.0343157	0.0284803	0.0222967	0.0017251	0.0190059	0.043973	0.3
3.	437.762	560.22	664.357	896.737	1031.25	1055.35	1104.53	1160.45	1201.43	1315.21	1332.09	1365.35	1426.1	1636.79	2892.7	3329.5	0.0899662	0.124674	0.0923554	0.0501814	0.173814	0.167343	0.102579	0.0664697	0.0276132	0.0429754	0.0394604	0.037242	0.0277576	0.00770222	0.0259036	0.052255	0.34
4.	436.316	559.255	667.25	897.219	1031.73	1055.84	1105.01	1160.94	1200.47	1315.7	1333.05	1366.32	1427.55	1636.79	2892.22	3330.94	0.106364	0.159732	0.108238	0.0447183	0.247764	0.238365	0.132061	0.0798627	0.0242535	0.0445943	0.0394944	0.0360016	0.0262775	0.0048951	0.0247124	0.0526445	0.37
5.	436.798	558.773	664.839	897.219	1031.25	1054.87	1104.53	1160.94	1200.95	1315.21	1333.54	1365.35	1426.58	1640.16	2890.77	3331.91	0.103796	0.157222	0.104985	0.0418982	0.249957	0.240437	0.129675	0.0766869	0.0202034	0.0445127	0.0390211	0.0351054	0.0256598	0.00441284	0.0258904	0.0540754	0.38
6.	436.316	559.737	664.839	896.737	1031.25	1054.87	1104.53	1160.94	1199.99	1315.21	1334.02	1366.32	1427.55	1640.64	2893.18	3335.76	0.107093	0.159845	0.108121	0.0441331	0.261147	0.250395	0.13677	0.0811476	0.0228682	0.0455034	0.0402655	0.0360703	0.0260449	0.00284531	0.0254634	0.0544581	0.39
7.	437.762	559.737	664.357	897.219	1031.25	1054.87	1105.01	1160.94	1200.95	1315.21	1334.02	1367.28	1427.07	1640.16	2894.15	3333.84	0.110623	0.160353	0.107026	0.0422885	0.244291	0.234171	0.127904	0.0768449	0.021927	0.0437516	0.0382269	0.0346267	0.0247362	0.00300118	0.0262848	0.0562963	0.4
8.	437.28	559.255	664.357	896.737	1031.25	1054.87	1104.53	1160.94	1200.47	1315.21	1333.05	1365.84	1426.1	1640.16	2892.7	3331.43	0.113612	0.168873	0.114614	0.0495867	0.272538	0.262058	0.143631	0.0873806	0.0286605	0.0501989	0.0447394	0.0410329	0.0310959	0.00859574	0.0287619	0.0574884	0.41
9.	431.977	558.291	665.803	897.701	1031.25	1054.87	1104.53	1161.42	1200.47	1315.21	1333.54	1365.84	1427.55	1636.79	2891.25	3332.87	0.124761	0.178754	0.1208	0.054295	0.270653	0.258211	0.145873	0.0897013	0.0311162	0.0542082	0.048367	0.0432314	0.0327347	0.00772992	0.0290384	0.0601163	0.44
10.	441.619	559.255	664.357	897.219	1031.25	1054.87	1104.53	1160.94	1200.95	1315.7	1333.54	1365.35	1426.1	1640.64	2895.59	3330.94	0.125481	0.18468	0.123233	0.0512422	0.300922	0.286626	0.1545	0.0922647	0.0284919	0.0523995	0.046403	0.0428263	0.0309588	0.00580221	0.0298527	0.0627738	0.45
11.	436.316	559.255	664.839	896.737	1031.25	1054.87	1104.53	1160.94	1200.47	1315.21	1333.05	1365.84	1426.1	1636.79	2895.11	3331.91	0.128121	0.187578	0.125776	0.0546929	0.302232	0.287692	0.1579	0.0961041	0.0324027	0.0554264	0.0495052	0.045228	0.0336839	0.00832166	0.0315216	0.0646554	0.45
12.	437.28	559.737	663.875	897.219	1030.77	1054.87	1104.53	1160.94	1200.47	1315.21	1333.54	1365.84	1426.58	1643.54	2890.29	3328.05	0.134103	0.198899	0.136097	0.0579631	0.31826	0.301886	0.164335	0.0991448	0.0324039	0.0571347	0.0507465	0.0457629	0.0337393	0.00590676	0.0303937	0.0653399	0.45
13.	443.065	559.255	664.839	897.219	1031.25	1054.87	1104.53	1160.94	1200.47	1315.21	1334.02	1366.32	1427.07	1636.79	2892.7	3331.91	0.117126	0.182074	0.117599	0.04627	0.303383	0.28635	0.150866	0.0873679	0.0226135	0.0508187	0.0444562	0.0402796	0.0287143	0.00353621	0.0328498	0.0658971	0.45
14.	433.423	559.255	664.839	897.219	1031.25	1054.87	1104.53	1160.94	1200.95	1315.21	1333.54	1367.28	1426.58	1640.64	2893.66	3331.43	0.120417	0.187232	0.122626	0.0451218	0.310502	0.294636	0.154016	0.0899655	0.0229083	0.0511015	0.0443255	0.0402024	0.0288032	0.00362906	0.0314292	0.0663768	0.45
15.	433.905	559.255	667.732	897.219	1031.25	1054.87	1104.53	1160.94	1200.47	1315.21	1333.54	1365.84	1426.58	1636.79	2889.32	3335.76	0.127804	0.191993	0.127237	0.0531916	0.304856	0.28974	0.156059	0.0948225	0.029215	0.0546332	0.0482358	0.0437295	0.032053	0.00598206	0.0302265	0.0664312	0.46
16.	436.798	557.809	663.875	897.219	1031.25	1054.39	1105.01	1159.97	1201.92	1315.21	1334.02	1369.69	1427.07	1636.79	2895.59	3332.39	0.120656	0.151595	0.113568	0.0493398	0.183193	0.178865	0.106545	0.0692213	0.0216428	0.0468724	0.0402587	0.0373708	0.029206	0.0157089	0.0297672	0.0668811	0.46
17.	435.834	557.809	662.91	896.255	1030.77	1054.87	1104.53	1160.45	1199.99	1315.21	1333.05	1367.77	1427.07	1644.02	2891.74	3329.02	0.130473	0.187205	0.127184	0.0496659	0.298138	0.281555	0.150075	0.0876221	0.0243363	0.0498658	0.0436558	0.0403924	0.0284608	0.0048656	0.0305752	0.0669957	0.46
18.	436.798	558.773	665.321	897.219	1031.25	1054.87	1104.53	1160.94	1200.95	1315.7	1334.02	1366.8	1427.55	1640.64	2893.18	3330.94	0.127315	0.190441	0.126798	0.0515626	0.311652	0.294444	0.158133	0.0930068	0.0258483	0.0528758	0.0464415	0.0417163	0.0296549	0.00202825	0.0300337	0.0670169	0.47
19.	436.798	558.773	664.839	896.737	1030.77	1054.39	1104.53	1160.45	1199.99	1315.21	1334.02	1366.8	1426.1	1644.02	2890.29	3335.28	0.134254	0.194763	0.127285	0.0527451	0.331409	0.31207	0.165723	0.0962961	0.0267388	0.0537699	0.047461	0.0422772	0.0301717	0.00136689	0.0297011	0.0673734	0.47
20.	440.655	559.737	663.393	895.773	1030.77	1051.98	1103.57	1159.97	1200.47	1315.21	1332.57	1369.69	1425.62	1644.02	2895.11	3338.18	0.136902	0.170831	0.121558	0.0632874	0.241625	0.232156	0.135851	0.0848719	0.0310505	0.0553318	0.0493863	0.0462454	0.035527	0.00364273	0.034416	0.0678781	0.48
21.	437.28	559.737	664.357	897.701	1030.77	1054.39	1104.53	1160.94	1200.47	1315.21	1334.02	1364.39	1426.58	1640.16	2893.18	3330.46	0.140295	0.19712	0.128989	0.0502657	0.322476	0.303917	0.161297	0.092869	0.0233218	0.0516861	0.0445316	0.0397897	0.0273366	-0.00134518	0.0297612	0.0680587	0.5
22.	433.905	558.773	664.839	896.737	1030.77	1054.39	1104.53	1160.94	1200.47	1315.21	1333.54	1365.84	1426.58	1636.79	2895.11	3335.28	0.130277	0.197718	0.129947	0.0527492	0.329433	0.310493	0.165713	0.0973407	0.0276937	0.0548902	0.0482933	0.043267	0.031139	0.00322114	0.0311967	0.0680854	0.5
23.	435.834	558.773	664.357	897.219	1030.77	1054.39	1104.53	1160.94	1200.47	1315.21	1333.54	1365.84	1427.07	1637.27	2892.7	3331.91	0.133095	0.198234	0.130931	0.0540779	0.339039	0.317762	0.168827	0.0985508	0.0288086	0.0554358	0.0491683	0.0443643	0.0317812	0.00274117	0.0313648	0.0686089	0.5
24.	436.316	559.255	664.839	897.219	1031.25	1054.87	1104.53	1160.94	1200.47	1315.21	1333.54	1366.32	1426.58	1636.79	2892.7	3334.8	0.13566	0.198502	0.131716	0.0532559	0.328274	0.310293	0.165082	0.0973588	0.0283896	0.0557311	0.0489994	0.044202	0.032027	0.00468978	0.0323411	0.0688603	0.52
25.	437.762	558.773	664.839	897.219	1031.25	1054.39	1104.53	1160.45	1200.95	1315.7	1333.54	1366.32	1427.07	1640.64	2892.22	3331.43	0.133034	0.196791	0.130824	0.0550678	0.314941	0.298153	0.16133	0.0957398	0.027993	0.0551445	0.0485525	0.0440124	0.0316902	0.00384435	0.0329281	0.0694717	0.52
26.	436.316	558.773	665.803	897.219	1030.77	1054.87	1104.05	1160.94	1199.99	1315.21	1334.5	1362.46	1427.55	1636.79	2893.66	3334.8	0.136681	0.197401	0.130646	0.0531823	0.32221	0.303285	0.164094	0.0962117	0.0268196	0.0552289	0.0485383	0.0430119	0.0307036	0.00179221	0.0313704	0.0701879	0.52
27.	435.834	559.255	664.357	896.737	1030.77	1054.39	1104.05	1160.45	1200.47	1315.21	1333.54	1365.84	1426.58	1640.64	2892.22	3330.46	0.142826	0.200893	0.135513	0.0581532	0.324887	0.307044	0.167552	0.10026	0.0308622	0.0587462	0.0516951	0.0461615	0.0343283	0.00630317	0.0334507	0.0707834	0.53
28.	441.619	558.773	664.839	897.219	1030.77	1054.87	1104.53	1160.94	1199.51	1315.21	1333.54	1365.84	1427.07	1636.79	2891.74	3331.91	0.140469	0.203627	0.135859	0.0549184	0.328191	0.309167	0.166114	0.0976672	0.0290654	0.0563575	0.0498262	0.0447982	0.0326425	0.00462314	0.0349772	0.0708427	0.58
29.	440.655	559.255	663.875	896.737	1030.77	1054.39	1104.05	1160.94	1200.47	1315.21	1333.54	1366.8	1427.07	1640.64	2894.63	3330.94	0.14245	0.205532	0.135292	0.0555771	0.34444	0.323351	0.172207	0.100339	0.0281136	0.0568234	0.0499126	0.04363	0.0315651	0.00209859	0.0314642	0.0708947	0.58
30.	436.798	558.291	664.357	896.737	1030.77	1054.39	1104.53	1160.94	1200.47	1315.21	1333.54	1366.32	1426.58	1640.64	2895.11	3331.43	0.146038	0.21206	0.140948	0.056786	0.343837	0.323131	0.172342	0.101598	0.0299938	0.0584699	0.0511703	0.0464188	0.0333774	0.00487421	0.0329755	0.071355	0.59
31.	436.316	559.255	664.839	896.255	1030.77	1054.39	1104.05	1160.94	1200.95	1315.21	1333.05	1365.84	1426.1	1640.16	2891.74	3331.43	0.143002	0.207207	0.138572	0.0581096	0.339058	0.319631	0.172282	0.102874	0.0330073	0.0589915	0.0524026	0.0477561	0.0345228	0.0065636	0.0334806	0.0719402	0.59
32.	437.28	559.737	664.839	895.773	1031.25	1054.39	1104.53	1160.45	1200.95	1315.7	1333.54	1366.8	1427.55	1644.02	2893.66	3334.8	0.148631	0.214573	0.144529	0.0603458	0.348356	0.328995	0.177108	0.104789	0.0339124	0.0618867	0.0548894	0.0505191	0.036851	0.0073336	0.0326602	0.0721271	0.61
33.	436.316	559.255	664.357	897.219	1030.77	1054.87	1104.53	1160.45	1200.47	1315.21	1333.54	1363.43	1427.55	1640.64	2893.66	3330.94	0.136152	0.203318	0.130536	0.0494651	0.341225	0.319607	0.166849	0.0948565	0.0228555	0.0525967	0.0455685	0.040305	0.0274883	-0.00189495	0.0324275	0.0723794	0.62
34.	436.316	559.255	664.839	896.737	1030.77	1054.39	1104.05	1160.45	1200.95	1315.21	1333.05	1365.35	1426.58	1636.79	2895.11	3330.94	0.143671	0.209879	0.139383	0.0560353	0.33905	0.319036	0.170272	0.100035	0.029062	0.0570771	0.0499801	0.0453004	0.032525	0.00443024	0.0320354	0.0725872	0.62
35.	439.208	558.291	664.839	896.737	1031.25	1054.87	1104.05	1160.94	1200.47	1315.7	1334.02	1366.32	1426.58	1637.27	2891.74	3331.43	0.137113	0.191802	0.133138	0.0635289	0.298206	0.282667	0.158591	0.0974744	0.0339812	0.05946	0.0530493	0.0490823	0.0362304	0.00817174	0.0353347	0.0733362	0.63
36.	437.28	559.255	662.428	897.701	1030.77	1054.39	1104.53	1160.94	1200.95	1315.21	1334.02	1365.35	1426.58	1644.02	2894.63	3330.94	0.147381	0.214948	0.143342	0.0606149	0.340094	0.319756	0.174481	0.103514	0.0327956	0.060968	0.0538542	0.0488102	0.0359692	0.0068525	0.0340902	0.0733545	0.63
37.	432.941	559.737	664.357	897.701	1030.77	1054.39	1104.53	1160.94	1200.95	1315.21	1333.54	1365.84	1426.58	1643.54	2891.74	3331.91	0.128606	0.203044	0.132006	0.0517828	0.333524	0.314276	0.165862	0.0972134	0.026439	0.0571925	0.0501979	0.0455069	0.0330433	0.00476883	0.0360958	0.0737996	0.64
38.	436.798	559.737	664.839	897.219	1031.25	1054.39	1104.53	1160.94	1200.47	1315.21	1333.54	1365.84	1426.58	1640.64	2894.15	3331.43	0.145774	0.210567	0.141704	0.0591514	0.338021	0.31963	0.172528	0.103568	0.0331793	0.0598947	0.0530306	0.0485056	0.0353584	0.0071755	0.0349474	0.0738034	0.64
39.	440.173	559.255	664.357	896.737	1031.25	1054.87	1104.53	1160.94	1200.47	1315.21	1333.05	1365.84	1426.1	1640.64	2895.11	3331.91	0.143342	0.213889	0.141711	0.0585888	0.342741	0.323286	0.174226	0.104048	0.0330073	0.0602331	0.0532287	0.0483141	0.0352811	0.0072489	0.0344566	0.0743173	0.65
40.	433.423	559.255	664.357	896.737	1030.77	1054.87	1104.05	1160.94	1200.95	1315.21	1333.05	1365.35	1426.1	1640.64	2893.18	3330.94	0.151332	0.213043	0.143614	0.0624053	0.339965	0.321816	0.175598	0.105704	0.03566	0.0621603	0.0550046	0.0502039	0.0368439	0.00781674	0.0354841	0.0743761	0.65
41.	440.655	558.291	667.732	896.737	1030.77	1054.39	1104.05	1160.45	1200.47	1315.21	1333.05	1363.91	1427.07	1636.79	2891.25	3331.91	0.147149	0.212971	0.141173	0.0580582	0.363313	0.338652	0.180255	0.10447	0.0304804	0.0601461	0.0527572	0.0467833	0.0340683	0.00298621	0.0340764	0.0750906	0.67
42.	436.316	559.737	667.25	896.255	1030.77	1054.39	1104.05	1160.94	1200.95	1315.21	1334.02	1365.84	1427.07	1636.79	2893.18	3331.43	0.149968	0.217081	0.141998	0.0573788	0.355042	0.331942	0.176773	0.103267	0.0310613	0.0588527	0.0520909	0.0484825	0.0333444	0.0026914	0.033829	0.0754381	0.67
43.	435.834	559.255	664.357	896.737	1030.77	1054.39	1104.05	1160.94	1200.47	1315.7	1333.54	1366.32	1427.07	1644.02	2894.63	3331.91	0.146868	0.213599	0.141972	0.0581897	0.346297	0.325885	0.175561	0.103912	0.0317853	0.0597242	0.0524573	0.0481097	0.0350651	0.00514505	0.0337824	0.0755548	0.69
44.	436.316	559.255	664.357	896.737	1030.77	1054.39	1104.53	1160.94	1200.47	1315.7	1333.54	1366.32	1426.58	1640.64	2893.66	3335.76	0.14924	0.217641	0.145917	0.0612975	0.356119	0.334473	0.180895	0.10801	0.0351667	0.062647	0.055938	0.0507143	0.0371778	0.00764025	0.0365287	0.0768675	0.7
45.	436.798	559.737	664.839	897.701	1030.77	1054.87	1104.53	1160.94	1200.47	1315.7	1333.54	1365.35	1426.58	1636.79	2892.22	3331.43	0.152887	0.211644	0.143633	0.0639125	0.329589	0.311936	0.173493	0.104936	0.034869	0.0627942	0.0558834	0.0501728	0.037483	0.00814863	0.0371842	0.0770942	0.7
46.	441.619	558.773	664.839	897.219	1030.77	1054.39	1104.05	1160.94	1200.47	1315.21	1334.02	1366.32	1427.07	1640.64	2891.74	3330.94	0.152191	0.220829	0.144183	0.0581347	0.367402	0.344008	0.18274	0.105516	0.0299365	0.0598476	0.0524112	0.0470195	0.0332059	0.00171685	0.0345695	0.0771768	0.71
47.	436.316	558.291	664.357	897.219	1030.77	1054.39	1104.05	1160.94	1200.47	1315.21	1334.02	1365.84	1427.07	1640.64	2893.66	3332.39	0.152194	0.220976	0.14629	0.0596535	0.358086	0.335876	0.179468	0.105444	0.0308523	0.0609224	0.0535351	0.0483538	0.0348245	0.00478488	0.0349708	0.0773476	0.72
48.	436.316	558.773	664.357	896.737	1030.77	1054.39	1104.05	1160.94	1200.95	1315.21	1333.54	1365.84	1426.1	1637.27	2892.7	3331.43	0.147264	0.213937	0.139476	0.0543317	0.349513	0.328268	0.173825	0.101583	0.0288726	0.0606778	0.0533783	0.0489278	0.0358371	0.00588165	0.0361075	0.0776071	0.72
49.	438.244	559.255	664.839	896.737	1031.25	1054.39	1104.53	1160.94	1200.47	1315.7	1334.02	1366.32	752.102	1640.64	2892.22	3332.87	0.145771	0.220361	0.144849	0.0589347	0.362436	0.33958	0.179858	0.106219	0.0320684	0.0619537	0.0550231	0.0496629	0.0362921	0.00571833	0.0375556	0.0783319	0.73
50.	436.798	559.255	664.357	896.737	1030.77	1054.39	1104.53	1160.45	1200.47	1315.21	1333.05	1365.84	1426.58	1640.64	2891.74	3331.43	0.151796	0.225268	0.150262	0.0650605	0.361101	0.339226	0.184227	0.110243	0.0366721	0.0651969	0.0579244	0.0524316	0.038928	0.00849963	0.0369689	0.0783846	0.74
51.	437.28	558.773	664.839	896.737	1030.77	1054.39	1104.53	1160.45	1200.95	1315.21	1334.02	1366.8	1427.07	1636.79	2892.22	3331.91	0.144572	0.204713	0.136284	0.0579015	0.315578	0.297689	0.162887	0.09596	0.0275884	0.0595324	0.0519703	0.047634	0.0346335	0.00537859	0.0384693	0.0787236	0.74
52.	434.869	558.773	668.214	896.255	1030.77	1054.39	1104.05	1160.45	1200.95	1315.21	1333.54	1366.32	1426.58	1643.54	2892.22	3332.39	0.148847	0.222302	0.145161	0.0564407	0.37174	0.345732	0.181999	0.105116	0.0289779	0.0619933	0.0541284	0.0487773	0.0350985	0.00361494	0.0370201	0.0787947	0.76
53.	433.905	559.737	664.839	898.183	1030.77	1054.39	1104.53	1160.45	1200.47	1314.73	1333.05	1365.84	1426.58	1636.79	2893.18	3329.02	0.149551	0.221801	0.148951	0.0668059	0.358889	0.337191	0.183595	0.111309	0.0385409	0.066694	0.0596309	0.0541011	0.0407646	0.0100784	0.0382258	0.0788544	0.77
54.	436.316	558.773	668.214	898.665	1030.77	1054.39	1104.05	1160.94	1200.47	1315.21	1334.02	1365.35	1426.58	1640.16	2894.63	3331.43	0.154831	0.225321	0.148309	0.0600724	0.36915	0.345385	0.183484	0.106529	0.0314932	0.063211	0.055439	0.0496511	0.0356073	0.00441084	0.0383222	0.0790016	0.78
55.	433.423	559.255	664.357	896.255	1030.77	1054.39	1104.05	1160.94	1199.99	1315.21	1333.54	1366.32	1426.58	1640.16	2892.22	3330.94	0.155681	0.220186	0.148001	0.0655988	0.353463	0.333323	0.182296	0.108711	0.0358914	0.064503	0.0572545	0.0519092	0.0380904	0.00641287	0.0373764	0.0791512	0.79
56.	437.28	558.773	664.357	896.737	1030.77	1054.39	1104.53	1160.94	1200.47	1315.21	1333.54	1366.32	1427.07	1637.27	2891.25	3331.91	0.145897	0.216507	0.143191	0.0603119	0.354663	0.332344	0.178888	0.105668	0.0325197	0.0619081	0.054689	0.0493587	0.0361363	0.00623556	0.0374979	0.0793594	0.8
57.	438.726	559.255	664.839	896.255	1030.77	1054.39	1104.05	1160.45	1200.47	1315.7	1334.02	1366.8	1427.55	1643.54	2893.18	3334.8	0.167365	0.23579	0.1562	0.0652246	0.386103	0.353776	0.188751	0.110076	0.035378	0.0649624	0.0576445	0.0531106	0.0393061	0.00746247	0.0369956	0.0797773	0.8
58.	435.834	559.255	663.875	896.737	1030.77	1054.39	1104.53	1160.45	1201.43	1315.21	1334.5	1367.28	1426.58	1640.64	2892.7	3331.91	0.158639	0.225773	0.150877	0.0571113	0.341408	0.32045	0.169321	0.0996439	0.0285868	0.0588712	0.0513823	0.047406	0.0349511	0.00981659	0.0368663	0.0802459	0.81
59.	436.798	559.255	664.839	896.737	1030.77	1054.39	1104.53	1160.45	1199.99	1315.7	1333.54	1365.84	1427.55	1636.79	2891.74	3331.91	0.148319	0.22029	0.142227	0.0551475	0.369995	0.343234	0.179033	0.101941	0.0261459	0.05779	0.0501551	0.0447581	0.0309684	-0.000456815	0.0366633	0.0806537	0.81
60.	436.316	558.773	664.357	897.219	1030.77	1054.39	1104.53	1160.94	1200.47	1315.21	1333.54	1364.87	1426.58	1637.27	2893.66	3331.43	0.158033	0.22707	0.149317	0.0613262	0.374467	0.348921	0.186417	0.109008	0.0324229	0.0632406	0.0555945	0.049737	0.0359248	0.00422603	0.0364249	0.0812305	0.82
61.	437.28	558.291	664.839	896.255	1030.77	1054.39	1104.05	1160.94	1200.47	1315.7	1334.02	1366.32	1428.03	1640.64	2892.7	3332.39	0.156164	0.219674	0.149211	0.0657512	0.351552	0.329595	0.180723	0.10587	0.031596	0.0634374	0.055587	0.0498536	0.0357997	0.00222	0.0354042	0.0813184	0.83
62.	437.28	559.255	664.357	896.737	1030.77	1054.39	1104.05	1160.45	1200.47	1315.21	1333.05	1365.35	1426.58	1637.27	2892.7	3332.39	0.164848	0.234918	0.155726	0.0644961	0.383008	0.356793	0.190623	0.111647	0.0336123	0.0644362	0.0568045	0.0510605	0.03654	0.00427649	0.0363991	0.0815783	0.83
63.	436.316	559.255	664.839	896.737	1030.77	1054.39	1104.53	1160.94	1200.47	1315.21	1333.54	1365.35	1426.58	1636.79	2893.18	3331.43	0.160912	0.22488	0.152654	0.0653973	0.35628	0.334805	0.183133	0.110286	0.0375386	0.0656723	0.0583592	0.0534567	0.0394748	0.00857386	0.0376407	0.0817793	0.84
64.	436.798	558.773	665.321	897.219	1030.77	1054.39	1104.05	1160.94	1200.47	1315.7	1334.02	1363.43	1427.55	1640.16	2894.15	3333.36	0.152807	0.225526	0.144866	0.0534239	0.373154	0.346496	0.17949	0.100984	0.0223374	0.0563362	0.0482283	0.0423637	0.0283924	-0.00454688	0.0352867	0.0820778	0.85
65.	440.655	559.255	664.839	897.219	1030.77	1054.39	1104.05	1160.45	1200.47	1315.21	1333.54	1365.35	1427.07	1637.27	2894.15	3331.43	0.151546	0.2249	0.144287	0.0562714	0.377747	0.350787	0.18295	0.104734	0.0284566	0.0616268	0.0539095	0.0493653	0.0347695	0.00252286	0.0387697	0.0822664	0.86
66.	441.619	558.291	664.357	896.737	1030.77	1054.39	1104.05	1160.45	1200.95	1315.7	1334.02	1366.32	1427.55	1640.64	2891.25	3332.87	0.157856	0.229436	0.151646	0.0624871	0.385009	0.356039	0.188991	0.109307	0.0319875	0.0636441	0.0562966	0.0502421	0.0363295	0.00343524	0.0371638	0.0822672	0.86
67.	433.905	558.773	662.91	898.183	1030.77	1054.39	1106.94	1159.97	1202.4	1315.21	1333.54	1369.69	1426.58	1644.02	2895.59	3331.91	0.179844	0.241162	0.173695	0.0638807	0.319072	0.306611	0.165408	0.102443	0.0322331	0.0617272	0.0531141	0.0496313	0.0379195	0.017527	0.0343919	0.0825428	0.87
68.	434.387	558.773	664.357	896.737	1030.77	1054.39	1104.53	1160.94	1200.47	1315.7	1333.54	1365.35	1426.58	1640.64	2893.18	3334.8	0.162575	0.231223	0.155696	0.0688528	0.366233	0.343921	0.188116	0.113255	0.0378083	0.0678472	0.0600041	0.0544729	0.0401675	0.00880885	0.0393817	0.0828388	0.88
69.	436.316	558.291	664.357	897.701	1030.77	1054.39	1104.05	1160.45	1200.47	1315.21	1333.05	1365.84	1426.58	1636.79	2892.22	3332.39	0.163348	0.236057	0.156988	0.0653	0.384872	0.359395	0.192759	0.114037	0.037756	0.0675193	0.0598263	0.0542204	0.0395459	0.00780744	0.0380967	0.0829523	0.88
70.	440.173	558.773	664.357	897.219	1030.77	1054.39	1104.05	1160.94	1200.95	1315.21	1334.02	1366.32	1427.07	1636.79	2894.63	3332.39	0.14916	0.228461	0.149555	0.0588692	0.368296	0.343611	0.181911	0.105886	0.0298432	0.0618641	0.0540379	0.0488112	0.0348516	0.00364149	0.0389157	0.0834498	0.89
71.	435.834	559.255	664.839	897.701	1030.77	1054.87	1104.05	1160.94	1200.47	1315.21	1333.54	1364.39	1427.07	1636.79	2889.81	3333.36	0.170552	0.234676	0.161137	0.0732225	0.381767	0.353513	0.194212	0.115313	0.0381305	0.0702797	0.0622299	0.0558737	0.0406392	0.00519532	0.0385104	0.0834762	0.89
72.	437.762	558.773	663.875	896.737	1030.77	1054.39	1104.05	1160.94	1200.95	1315.21	1333.54	1365.84	1427.07	1637.27	2895.11	3331.43	0.157322	0.23027	0.151874	0.065895	0.362819	0.339005	0.183631	0.108537	0.0337142	0.0661472	0.058179	0.0526668	0.0383439	0.00626858	0.0406716	0.0840957	0.92
73.	436.798	559.255	664.357	898.183	1030.77	1054.39	1104.53	1160.94	1200.95	1315.21	1333.54	1365.35	1426.58	1640.64	2890.29	3330.94	0.145198	0.215841	0.142658	0.057127	0.348822	0.326964	0.173912	0.102952	0.0309516	0.060444	0.0532061	0.0483426	0.0349014	0.00628037	0.0422765	0.0841294	0.92
74.	433.905	558.773	664.357	896.737	1030.28	1054.39	1104.05	1160.45	1200.47	1315.21	1334.5	1367.28	1427.07	1636.79	2892.7	3331.91	0.173872	0.240815	0.16099	0.063218	0.386885	0.35665	0.188198	0.108565	0.0317482	0.0633708	0.0554637	0.0510126	0.0368457	0.00623237	0.0364263	0.0843634	0.93
75.	436.316	558.291	664.839	896.737	1030.77	1054.39	1104.05	1160.45	1200.95	1315.21	1334.02	1366.32	1427.55	1640.16	2891.74	3331.43	0.164116	0.226647	0.151874	0.0689929	0.352282	0.329789	0.182377	0.107467	0.0333927	0.0658929	0.0580753	0.0522968	0.0377452	0.00334734	0.0380479	0.0847548	0.93
76.	443.065	559.255	664.839	897.219	1030.77	1054.39	1104.53	1160.94	1200.47	1315.21	1334.02	1366.32	1427.55	1640.64	2893.18	3331.43	0.155385	0.230107	0.147609	0.0594524	0.384783	0.356524	0.18758	0.107969	0.0303805	0.0646034	0.0567993	0.0517292	0.0369353	0.00365185	0.0396904	0.0847845	0.94
77.	437.28	559.255	664.357	896.737	1030.77	1054.39	1104.05	1160.45	1200.47	1315.21	1333.05	1365.84	1426.58	1636.79	2892.7	3331.43	0.17353	0.238911	0.15991	0.0702152	0.38545	0.359389	0.194391	0.115305	0.0375754	0.0695703	0.0614985	0.0559318	0.0409618	0.00721492	0.0392221	0.0848952	0.94
78.	436.798	558.773	663.875	897.701	1030.77	1054.39	1104.05	1160.45	1200.47	1315.21	1333.05	1365.84	1426.58	1636.79	2891.25	3331.43	0.167912	0.238036	0.157957	0.0680363	0.378534	0.353173	0.190962	0.113276	0.0371689	0.0674702	0.0596331	0.0543163	0.0393599	0.00674349	0.0392935	0.0850188	0.95
79.	433.905	559.255	664.839	897.219	1030.28	1054.39	1104.05	1160.45	1200.95	1315.7	1334.02	1367.28	1427.07	1640.16	2894.15	3331.91	0.174264	0.248728	0.161983	0.0613332	0.382022	0.351894	0.184308	0.105469	0.0290996	0.0628564	0.0544482	0.050512	0.0361517	0.00748868	0.0399941	0.0853894	0.95
80.	436.316	558.773	663.875	896.737	1030.77	1054.39	1105.01	1159.97	1202.4	1315.21	1334.02	1369.69	1427.07	1643.54	2895.11	3333.36	0.179039	0.237145	0.165025	0.0573144	0.310526	0.298307	0.158631	0.0976257	0.0272085	0.0578682	0.0493689	0.0457273	0.0347559	0.0158648	0.0349807	0.0854051	0.95
81.	436.798	559.255	664.357	896.737	1030.77	1054.39	1104.05	1160.94	1199.99	1315.7	1334.02	1366.8	1427.55	1643.54	2893.18	3335.28	0.158613	0.233531	0.149246	0.0586535	0.394058	0.363433	0.189221	0.107351	0.0271576	0.0615328	0.0532621	0.0470368	0.0326803	-0.00167106	0.0384735	0.0854871	0.96
82.	435.834	558.773	664.357	897.701	1030.77	1054.39	1104.05	1160.94	1200.47	1315.21	1334.02	1366.32	1427.07	1636.79	2893.66	3333.36	0.168309	0.239265	0.156286	0.0658824	0.392281	0.363499	0.193872	0.113045	0.0344851	0.0683694	0.0603009	0.0543873	0.0394491	0.00533432	0.0398901	0.0861562	0.96
83.	436.798	559.255	664.839	897.219	1030.77	1054.39	1104.05	1160.45	1200.47	1315.21	1334.02	1366.32	1427.55	1636.79	2892.22	3331.43	0.169559	0.242544	0.156334	0.0641868	0.404502	0.373924	0.197482	0.112924	0.0317983	0.0655079	0.0574703	0.0511402	0.0356557	-0.000102217	0.0373602	0.086159	0.97
84.	435.834	557.327	663.875	896.255	1030.77	1054.39	1104.53	1160.45	1201.43	1315.21	1334.02	1365.84	1426.1	1640.64	2895.59	3330.94	0.165156	0.230315	0.155367	0.0614334	0.344171	0.323898	0.171449	0.102267	0.033233	0.0616712	0.0542882	0.0542701	0.0377215	0.0104815	0.0417175	0.0865436	1
85.	435.834	558.291	664.357	896.737	1030.77	1054.39	1103.57	1159.97	1201.43	1315.21	1334.5	1366.32	1426.58	1644.02	2893.66	3331.91	0.186847	0.253229	0.169214	0.0714818	0.374582	0.348616	0.187192	0.10913	0.0333825	0.0659176	0.05733	0.0532114	0.0399848	0.00809456	0.0385664	0.0865931	1.01
86.	436.316	558.291	664.357	897.219	1030.77	1054.39	1104.05	1160.45	1200.47	1315.21	1333.54	1365.84	1426.58	1636.79	2892.7	3331.91	0.165355	0.237056	0.156936	0.0675227	0.383183	0.357452	0.192796	0.114719	0.0378238	0.0683229	0.0606013	0.0548162	0.0400936	0.007909	0.0407845	0.086757	1.02
87.	441.137	558.773	663.393	897.219	1030.28	1054.39	1104.53	1160.45	1201.43	1315.21	1333.54	1364.39	1427.07	1640.64	2891.74	3331.43	0.166447	0.235335	0.156597	0.0616164	0.367146	0.341993	0.180289	0.105748	0.031192	0.0626707	0.054967	0.0508315	0.0372009	0.00899899	0.0415388	0.086875	1.03
88.	436.798	559.255	664.357	896.737	1030.77	1054.39	1104.05	1160.94	1200.95	1315.21	1333.54	1364.39	1426.58	1636.79	2894.63	3330.94	0.174296	0.245418	0.160701	0.0664801	0.404622	0.374214	0.198542	0.115397	0.0345085	0.0679625	0.0597249	0.0541585	0.038618	0.00428776	0.0389046	0.0877167	1.14
89.	436.798	558.291	662.91	896.737	1030.77	1054.39	1104.53	1159.97	1201.43	1315.21	1333.54	1369.21	1426.58	1636.79	2895.59	3331.43	0.18586	0.24179	0.169594	0.0634685	0.328124	0.311176	0.169344	0.103655	0.0312636	0.062664	0.0538827	0.0495925	0.0372866	0.0147354	0.0356969	0.0889065	1.19
90.	435.834	558.773	665.321	897.219	1030.77	1054.39	1104.05	1160.94	1200.95	1315.21	1334.02	1366.32	1427.55	1636.79	2892.7	3332.87	0.170614	0.245573	0.158098	0.063617	0.41274	0.379391	0.198779	0.11346	0.0310531	0.0660548	0.0576091	0.0510726	0.0360866	0.000132402	0.039432	0.0889936	1.22
91.	436.316	559.255	664.839	896.737	1030.77	1054.39	1104.05	1159.97	1201.43	1315.21	1334.5	1366.8	1427.55	1640.64	2894.15	3331.91	0.179986	0.249416	0.166047	0.0688431	0.398093	0.366184	0.194788	0.111819	0.0334419	0.0669927	0.0587477	0.0540172	0.0386364	0.00461573	0.0400625	0.0890053	1.23
92.	437.762	558.773	664.839	896.737	1030.77	1054.39	1104.05	1160.94	1200.47	1315.21	1333.54	1365.84	1427.07	1640.64	2891.74	3332.87	0.171731	0.246288	0.162172	0.0687018	0.397694	0.370584	0.198531	0.117082	0.0373029	0.0696625	0.0613892	0.0556079	0.0403974	0.00693423	0.0413581	0.0890411	1.24
93.	434.387	558.773	663.875	898.183	1030.28	1054.39	1104.53	1160.45	1200.95	1315.7	1333.54	1366.8	1427.07	1636.79	2890.77	3335.28	0.177576	0.247192	0.163326	0.0634764	0.391354	0.363681	0.1913	0.111504	0.0328816	0.0654201	0.0572687	0.0530213	0.0381391	0.00806853	0.0402587	0.0905544	1.24
94.	436.316	558.291	664.839	896.255	1030.77	1054.39	1104.05	1160.45	1201.43	1315.21	1334.5	1369.21	1427.07	1640.64	2893.18	3333.36	0.175513	0.245517	0.164149	0.0640933	0.369678	0.344511	0.181989	0.10699	0.0312833	0.0652243	0.0568247	0.0526351	0.0385975	0.00994067	0.042701	0.0907388	1.32
95.	436.316	558.291	664.839	897.219	1030.28	1054.39	1104.05	1160.45	1200.47	1315.21	1333.54	1365.84	1427.55	1644.02	2893.18	3334.8	0.173922	0.247043	0.162264	0.0703503	0.399313	0.370312	0.198672	0.116969	0.037131	0.072209	0.063615	0.057878	0.0426187	0.00738564	0.0443686	0.0913349	1.34
96.	440.655	558.773	664.839	896.737	1030.77	1054.39	1104.05	1160.45	1200.95	1315.21	1333.54	1366.32	1427.07	1636.79	2893.18	3332.39	0.17069	0.244291	0.162965	0.0714239	0.391714	0.362967	0.197128	0.117652	0.0391064	0.0719392	0.063805	0.0583093	0.043616	0.0103172	0.044427	0.0913645	1.45
97.	436.798	558.773	664.357	896.737	1030.28	1054.39	1104.05	1160.45	1200.47	1315.21	1334.5	1366.8	1427.07	1640.64	2892.7	3333.36	0.200563	0.253809	0.169577	0.070212	0.402003	0.370095	0.196699	0.113749	0.0334133	0.0680007	0.0597786	0.0544158	0.0388829	0.00476032	0.0394308	0.0916939	1.46
98.	436.316	558.773	664.357	896.737	1030.77	1054.39	1104.53	1160.45	1200.95	1315.21	1334.5	1366.8	1427.07	1643.54	2892.7	3330.94	0.18469	0.258471	0.170941	0.0670918	0.39939	0.370765	0.194288	0.11278	0.0323007	0.0678401	0.058534	0.0534858	0.038874	0.00689247	0.0406175	0.0920383	1.55
99.	436.316	558.291	664.839	896.737	1030.77	1054.39	1104.05	1160.94	1199.51	1315.21	1334.02	1366.8	1427.55	1644.02	2893.18	3331.91	0.163478	0.238402	0.157412	0.0699798	0.371277	0.346024	0.187936	0.111081	0.0357344	0.069367	0.0609721	0.0551552	0.0403139	0.00786205	0.0466017	0.0925893	1.62
100.	436.798	559.255	664.839	897.701	1030.77	1054.39	1104.05	1160.45	1200.47	1315.21	1333.54	1365.84	1426.58	1640.64	2894.63	3335.76	0.182525	0.258263	0.168491	0.0695966	0.425431	0.392056	0.207599	0.120234	0.0367923	0.0713334	0.0627697	0.0566097	0.0405458	0.0038773	0.0414111	0.0929992	1.63
101.	435.834	557.809	664.839	897.219	1030.77	1054.39	1104.05	1160.94	1200.47	1315.21	1333.54	1365.35	1426.58	1636.79	2892.22	3334.32	0.177438	0.252217	0.164783	0.0701082	0.404531	0.374123	0.200738	0.117354	0.0367706	0.0709659	0.062362	0.0566456	0.0407641	0.00575427	0.044711	0.0930438	1.64
102.	437.762	558.773	663.875	897.219	1030.77	1053.91	1104.53	1160.45	1200.95	1315.7	1334.02	1368.73	1426.58	1643.54	2894.63	3332.87	0.176984	0.256819	0.169501	0.0648662	0.402727	0.372437	0.194814	0.112661	0.0332958	0.0665139	0.0580531	0.0538643	0.0383795	0.00736103	0.0412356	0.0933718	1.65
103.	436.798	558.773	664.357	897.219	1030.28	1053.91	1104.05	1159.97	1200.95	1315.21	1334.98	1362.94	1428.03	1643.54	2892.22	3331.91	0.180793	0.253873	0.167081	0.06208	0.402531	0.371695	0.192118	0.11039	0.0290203	0.0661646	0.057029	0.0525917	0.0380988	0.00714176	0.0408997	0.0934158	1.82
104.	437.762	558.291	664.839	896.737	1030.28	1053.91	1104.05	1159.97	1200.95	1315.21	1333.54	1366.8	1426.58	1640.64	2891.25	3331.91	0.193549	0.26226	0.175387	0.0732274	0.417215	0.383374	0.203615	0.117793	0.0362474	0.0706465	0.0621405	0.0567054	0.0410301	0.00640633	0.0403483	0.0934561	1.84
105.	436.316	558.291	664.839	897.219	1030.28	1053.91	1104.05	1160.45	1200.47	1315.7	1334.02	1366.32	1427.07	1637.27	2893.18	3334.32	0.185814	0.255039	0.167835	0.0714379	0.424787	0.390432	0.207899	0.120738	0.0375746	0.0719841	0.0634221	0.057316	0.0413848	0.00457037	0.0423822	0.0938078	1.94
106.	433.423	558.291	664.839	897.219	1030.28	1053.91	1104.05	1160.45	1200.47	1315.7	1333.54	1365.84	1427.07	1640.64	2894.63	3334.8	0.18367	0.260532	0.170051	0.072437	0.435574	0.399608	0.211487	0.122066	0.0369291	0.0722958	0.0637444	0.0570318	0.0407929	0.00249321	0.0419661	0.0939346	1.95
107.	436.316	558.773	664.357	897.701	1030.77	1054.39	1104.05	1160.94	1200.47	1315.21	1333.54	1365.84	1427.07	1640.64	2893.66	3332.87	0.181894	0.261376	0.169384	0.0718097	0.421895	0.389663	0.207911	0.122356	0.0394517	0.0731636	0.0646255	0.0587189	0.0424751	0.0065964	0.0426806	0.0939559	2.18
108.	437.28	559.255	664.357	896.255	1030.28	1054.39	1104.05	1160.45	1200.47	1315.21	1334.02	1366.8	1427.07	1636.79	2892.7	3331.91	0.164854	0.243833	0.155467	0.0599655	0.413584	0.380674	0.198758	0.112963	0.0300025	0.0686064	0.059833	0.0542251	0.0390279	0.00369854	0.0429898	0.0942195	2.22
109.	434.869	558.291	663.875	896.737	1030.77	1054.39	1104.53	1160.45	1201.92	1315.21	1334.02	1369.69	1426.58	1640.64	2896.07	3331.43	0.185579	0.246885	0.173726	0.0678509	0.332754	0.316177	0.172867	0.106554	0.0328997	0.0670867	0.057787	0.0536585	0.0413336	0.0168766	0.0422355	0.0954487	2.23
110.	436.316	558.291	663.875	896.737	1030.28	1054.39	1104.53	1160.45	1201.43	1315.21	1333.54	1365.35	1427.07	1640.64	2892.22	3338.18	0.189032	0.259018	0.172598	0.0681154	0.396435	0.367682	0.194973	0.114004	0.0345543	0.0708208	0.0621215	0.0572471	0.0426656	0.0127422	0.046057	0.0957835	2.24
111.	435.834	558.773	664.357	897.219	1030.77	1054.39	1104.05	1160.45	1200.47	1315.7	1333.05	1366.32	1427.07	1640.64	2892.7	3331.91	0.189461	0.259687	0.173417	0.0774495	0.409946	0.379719	0.206283	0.120966	0.0382415	0.0740983	0.0649187	0.0589467	0.0424501	0.00524837	0.0435622	0.0969655	2.3
112.	436.798	558.291	664.357	896.737	1030.28	1053.91	1104.05	1160.45	1200.95	1315.7	1334.02	1366.32	1427.07	1637.27	2895.11	3331.43	0.202772	0.266676	0.177533	0.0805049	0.417556	0.385777	0.209622	0.122568	0.0384686	0.0748948	0.0657051	0.0597473	0.0425779	0.00376528	0.0428028	0.0978389	2.34
113.	436.798	558.773	664.357	896.737	1030.28	1054.39	1104.05	1160.45	1200.95	1315.21	1333.54	1366.32	1427.55	1636.79	2895.11	3331.43	0.184544	0.264734	0.172943	0.0741132	0.424081	0.391236	0.208287	0.121674	0.0376985	0.0749337	0.0658038	0.0594599	0.0433832	0.00573113	0.0434999	0.0980233	2.35
114.	440.173	558.773	664.357	896.255	1030.77	1053.91	1104.05	1160.94	1200.47	1315.7	1334.02	1365.84	1427.07	1640.64	2892.7	3329.5	0.194378	0.266376	0.176014	0.0773033	0.422705	0.390633	0.209726	0.12238	0.038782	0.0759927	0.0666519	0.060383	0.0433547	0.00446435	0.0477481	0.101578	2.37
115.	432.941	557.809	664.357	896.737	1030.28	1053.91	1104.05	1160.45	1200.95	1315.21	1334.98	1362.94	1428.03	1643.54	2892.7	3331.91	0.20536	0.279632	0.182791	0.0716424	0.442709	0.40242	0.208726	0.119137	0.0330097	0.0739444	0.0640784	0.0592631	0.0428484	0.00767938	0.0440443	0.102061	2.41
116.	436.316	558.773	664.357	896.255	1030.28	1053.91	1104.05	1159.97	1200.95	1315.21	1334.02	1366.32	1427.07	1643.54	2892.22	3331.91	0.203374	0.281122	0.185875	0.0749106	0.438655	0.402099	0.210519	0.121178	0.0358765	0.0732024	0.0636815	0.0582211	0.0414517	0.0066599	0.0436158	0.102107	2.45
117.	437.28	558.291	664.357	896.737	1030.28	1054.39	1103.57	1160.45	1200.95	1315.21	1333.54	1365.84	1427.07	1640.64	2892.7	3330.94	0.201228	0.273481	0.183374	0.081452	0.427458	0.395089	0.214168	0.125476	0.0400222	0.0775258	0.0675947	0.0615547	0.0442913	0.00596388	0.0449735	0.102128	2.46
118.	436.798	557.809	661.946	896.737	1030.77	1054.39	1104.53	1159.97	1202.4	1315.21	1334.02	1369.69	1426.58	1640.16	2893.66	3331.43	0.206467	0.268502	0.189168	0.0749358	0.354896	0.338427	0.184492	0.115186	0.0365874	0.0722312	0.0622477	0.0577237	0.0441943	0.0202494	0.0438795	0.102254	2.47
119.	443.065	558.291	664.357	896.737	1030.28	1053.91	1104.05	1159.97	1201.43	1315.21	1334.5	1367.28	1427.55	1640.64	2892.7	3334.32	0.195511	0.27443	0.180688	0.0709787	0.419645	0.38602	0.203365	0.117794	0.0325283	0.0721043	0.0621508	0.0571186	0.0415778	0.00820655	0.0447447	0.104172	2.48
120.	431.977	558.291	664.357	897.219	1030.28	1054.39	1104.05	1159.97	1200.95	1315.21	1334.5	1367.77	1427.55	1640.64	2894.63	3331.91	0.210041	0.273242	0.188025	0.075606	0.388627	0.362711	0.196041	0.117369	0.0366637	0.0736168	0.0640278	0.0590941	0.0447575	0.0153935	0.0455901	0.104328	2.53
121.	437.28	557.327	664.357	896.737	1030.28	1053.91	1104.05	1160.45	1200.95	1315.21	1333.54	1365.35	1426.58	1640.64	2893.66	3331.43	0.203924	0.280504	0.186961	0.0813748	0.451139	0.414843	0.222139	0.131786	0.0448405	0.0804536	0.0712073	0.0650454	0.0478959	0.0104442	0.048364	0.104632	2.55
122.	435.351	558.773	665.321	897.701	1030.28	1053.91	1104.05	1160.45	1200.47	1315.21	1333.54	1366.32	1427.07	1640.64	2892.7	3331.43	0.207042	0.283221	0.184721	0.0766652	0.458082	0.419967	0.221	0.128293	0.039655	0.0782868	0.0685994	0.0627035	0.0451787	0.00584633	0.0475245	0.105114	2.57
123.	441.137	558.291	664.839	897.701	1030.77	1053.91	1104.05	1160.45	1200.47	1315.21	1333.54	1366.32	1428.03	1636.79	2895.11	3332.87	0.198575	0.279343	0.185633	0.0840048	0.448477	0.410319	0.22147	0.130071	0.0425037	0.0817466	0.0718433	0.0650662	0.0474489	0.00669274	0.0483519	0.108027	2.61
124.	436.316	558.773	663.875	897.701	1030.28	1053.91	1104.05	1159.97	1200.95	1315.21	1334.5	1369.69	1427.07	1643.54	2892.7	3331.43	0.213068	0.288581	0.191861	0.0756875	0.433313	0.398181	0.210369	0.123062	0.0367936	0.0757343	0.0656909	0.0605881	0.0442527	0.0110564	0.049268	0.10848	2.66
125.	436.798	558.773	664.357	896.737	1030.28	1053.91	1104.05	1160.45	1200.47	1315.21	1334.02	1366.32	1427.55	1636.79	2894.15	3331.91	0.211865	0.290688	0.188522	0.0818702	0.476143	0.43204	0.22714	0.130409	0.0406201	0.0814237	0.0717294	0.0648676	0.0465043	0.00420385	0.0509978	0.109917	2.66
126.	433.905	558.773	664.839	896.737	1030.28	1053.91	1104.05	1160.45	1200.47	1315.7	1334.02	1365.84	1427.07	1636.79	2893.66	3332.39	0.219483	0.290282	0.193844	0.0894848	0.450786	0.412797	0.224221	0.131448	0.043665	0.0827606	0.0726969	0.0664511	0.0483691	0.00806006	0.0497037	0.110547	2.71
127.	440.655	557.809	663.875	897.701	1030.28	1053.91	1104.05	1159.97	1200.95	1315.21	1334.02	1367.28	1427.07	1640.64	2893.66	3331.91	0.218554	0.293602	0.195739	0.0814204	0.440713	0.405911	0.215654	0.127498	0.0407535	0.0799022	0.069842	0.0644577	0.0480388	0.0129263	0.0505485	0.110854	2.78
128.	436.798	559.255	664.357	896.737	1030.28	1053.91	1104.05	1160.45	1199.51	1315.7	1333.05	1360.05	1427.07	1636.79	2893.66	3332.39	0.222119	0.299934	0.196824	0.0869578	0.49083	0.445608	0.237214	0.137884	0.0425289	0.0852327	0.0746807	0.0635561	0.0483825	0.00671314	0.0501737	0.112092	2.78
129.	436.316	558.291	663.393	897.219	1030.28	1053.91	1104.05	1159.97	1200.95	1315.21	1334.5	1369.21	1427.55	1640.64	2895.11	3331.91	0.223954	0.302946	0.200578	0.0811402	0.444737	0.408386	0.216567	0.12768	0.0402672	0.0805201	0.0697919	0.063872	0.0479814	0.0142117	0.0516168	0.113064	2.8
130.	433.423	558.291	660.982	896.737	1030.28	1053.91	1104.53	1159.97	1201.43	1315.21	1334.5	1366.8	1427.55	1637.27	2895.59	3331.91	0.240105	0.313933	0.213812	0.0861664	0.428097	0.397159	0.213017	0.128842	0.0413111	0.0816999	0.0707058	0.0653606	0.0495531	0.0188309	0.0497704	0.116902	2.82
131.	436.316	558.291	664.357	897.219	1030.28	1053.91	1104.05	1159.97	1201.43	1315.21	1334.02	1366.8	1427.55	1640.64	2892.22	3333.36	0.22432	0.305098	0.198211	0.0787704	0.468888	0.427243	0.222629	0.12894	0.038019	0.0793326	0.0688187	0.0626824	0.0456479	0.00830222	0.0511984	0.11704	2.89
132.	433.423	558.291	664.839	896.737	1028.36	1053.91	1104.05	1159.97	1200.95	1315.21	1334.5	1366.8	1427.07	1640.64	2893.18	3330.94	0.228066	0.30539	0.19923	0.0817449	0.469898	0.427889	0.223278	0.128896	0.0387854	0.080677	0.0699884	0.0644255	0.0468525	0.0093817	0.0550264	0.119223	2.9
133.	436.798	557.327	663.875	896.737	1030.28	1053.91	1104.53	1159.97	1201.43	1315.21	1334.02	1369.69	1427.55	1643.54	2891.74	3330.46	0.241726	0.322916	0.220412	0.0844832	0.432129	0.402662	0.213867	0.129749	0.0422188	0.0826724	0.0710376	0.0655958	0.0498974	0.0208904	0.0505315	0.121534	2.91
134.	433.423	557.809	661.946	896.737	1030.28	1053.91	1104.05	1159.97	1201.43	1315.21	1334.02	1369.21	1427.07	1640.16	2895.11	3334.32	0.252084	0.321482	0.220727	0.0873881	0.448228	0.41567	0.220663	0.131114	0.0395012	0.0831319	0.0711898	0.0656423	0.0484378	0.0161779	0.0515474	0.124658	2.91
135.	436.316	557.327	663.875	896.255	1030.28	1053.91	1104.05	1159.97	1201.92	1315.21	1334.02	1369.69	1427.07	1640.64	2894.63	3331.91	0.247518	0.324892	0.223801	0.0898005	0.444175	0.414032	0.222543	0.135961	0.0445334	0.087226	0.0755977	0.0701514	0.053601	0.0225908	0.0536437	0.124974	2.92
136.	436.316	558.291	663.875	896.737	1030.28	1053.91	1104.05	1159.97	1201.92	1315.21	1334.5	1369.21	1427.55	1640.64	2893.66	3332.87	0.237662	0.311614	0.209576	0.0798761	0.435459	0.40351	0.212031	0.125238	0.0344041	0.0800856	0.0686238	0.0631463	0.0467885	0.0164041	0.0561553	0.12743	2.97
137.	437.762	557.809	663.875	896.737	1029.8	1053.91	1104.05	1159.97	1201.92	1315.21	1334.5	1369.21	1427.55	1640.64	2895.11	3331.43	0.260962	0.334948	0.223818	0.0837718	0.470809	0.432634	0.225427	0.131827	0.0366866	0.0818071	0.0694932	0.06398	0.0464683	0.0129864	0.0507663	0.127704	2.97
138.	442.583	557.327	662.91	896.737	1030.77	1054.39	1104.53	1160.45	1202.4	1315.21	1334.5	1369.69	1427.07	1640.64	2892.22	3331.91	0.251778	0.310947	0.223299	0.0958134	0.386816	0.368303	0.20853	0.132687	0.0467792	0.0898418	0.0774423	0.0711988	0.0554473	0.0273846	0.05459	0.127891	2.98
139.	436.316	557.809	662.91	897.219	1030.28	1053.91	1104.05	1159.97	1201.92	1315.21	1334.5	1369.21	1427.55	1640.64	2895.59	3334.32	0.262329	0.340157	0.22831	0.0872491	0.474337	0.436709	0.229253	0.137103	0.0430544	0.0863933	0.0745432	0.0690244	0.052006	0.0200958	0.0531479	0.129113	3.03
140.	443.065	558.773	663.875	897.219	1029.8	1053.91	1104.05	1159.97	1201.92	1315.21	1334.5	1367.28	1427.55	1637.27	2896.56	3331.91	0.244986	0.330665	0.225826	0.0868637	0.477817	0.436624	0.229694	0.13415	0.0402463	0.0852926	0.0736556	0.0678635	0.0501951	0.0159962	0.0566823	0.12959	3.04
141.	436.316	558.291	663.393	896.255	1030.77	1053.91	1104.53	1159.97	1201.92	1315.21	1334.02	1369.69	1427.55	1640.16	2896.07	3333.36	0.258373	0.320467	0.228502	0.0938907	0.404504	0.385338	0.213986	0.135377	0.0452249	0.0896629	0.076696	0.0707602	0.0550765	0.0281589	0.0544106	0.134019	3.12
142.	436.798	557.327	664.357	896.255	1030.77	1053.91	1104.53	1159.97	1201.92	1315.21	1334.98	1369.69	1428.03	1644.02	2894.63	3333.84	0.218627	0.285211	0.201701	0.0854757	0.363136	0.343738	0.193293	0.121225	0.0373938	0.0828369	0.0704411	0.0644958	0.0496725	0.0223436	0.0556523	0.135628	3.12
143.	437.762	557.809	662.428	896.737	1028.36	1053.91	1104.05	1159.97	1201.43	1315.21	1334.5	1367.28	1428.03	1636.79	2894.15	3331.91	0.273449	0.361114	0.237925	0.0942419	0.521866	0.471297	0.245444	0.142504	0.0425924	0.090307	0.0774561	0.0713646	0.0520735	0.0130952	0.0545063	0.136631	3.13
144.	437.762	557.809	663.393	897.219	1030.28	1053.91	1104.05	1159.97	1201.43	1315.21	1334.02	1369.21	1427.55	1636.79	2895.11	3331.43	0.282888	0.365656	0.245874	0.0951411	0.51136	0.466761	0.244733	0.145263	0.045236	0.0921967	0.0791834	0.0727486	0.0546462	0.0197141	0.0550358	0.13746	3.2
145.	432.941	557.809	661.946	896.737	1030.28	1053.91	1104.05	1159.97	1201.92	1315.21	1334.02	1367.77	1427.55	1644.02	2894.63	3332.39	0.259584	0.336221	0.232642	0.100774	0.45171	0.421546	0.232089	0.141626	0.0477192	0.0948408	0.081979	0.0755825	0.0577381	0.0225131	0.0596662	0.141484	3.3
146.	433.905	556.845	663.875	896.737	1030.28	1053.91	1104.05	1159.97	1201.43	1315.21	1334.02	1369.21	1427.55	1640.64	2891.74	3331.91	0.292336	0.375596	0.249684	0.0967654	0.524422	0.478163	0.249623	0.148379	0.047543	0.0946775	0.0815114	0.0755342	0.0564233	0.0206203	0.0584092	0.141651	3.34
147.	434.387	557.327	662.428	896.737	1030.28	1053.91	1104.53	1159.97	1202.4	1315.21	1334.02	1369.69	1427.07	1636.79	2894.15	3332.39	0.302854	0.377352	0.258001	0.0999042	0.498951	0.455033	0.243379	0.150455	0.0510647	0.0976141	0.0840731	0.0778868	0.0596592	0.0296882	0.0600177	0.141822	3.44
148.	436.316	557.327	661.946	896.737	1030.28	1053.91	1104.53	1159.97	1201.43	1315.21	1334.02	1369.21	1427.55	1640.64	2893.18	3334.8	0.292795	0.375708	0.248855	0.0941082	0.520666	0.474475	0.24702	0.147032	0.0464055	0.0932979	0.0804351	0.0744027	0.0562618	0.0207501	0.0581968	0.141932	3.45
149.	433.423	557.327	661.464	896.737	1030.28	1053.91	1104.53	1159.97	1201.92	1315.21	1334.5	1369.69	1427.55	1643.54	2894.15	3331.43	0.289812	0.375512	0.251721	0.0981666	0.517194	0.472128	0.248328	0.148654	0.0485145	0.0956282	0.082403	0.0763575	0.0572652	0.0216533	0.0590411	0.143305	3.47
150.	437.762	558.291	663.393	897.219	1029.8	1053.91	1104.05	1159.97	1201.92	1315.21	1334.02	1369.69	1427.07	1640.64	2892.7	3334.32	0.289065	0.373397	0.251328	0.101575	0.520954	0.476	0.251563	0.149773	0.0500001	0.0972296	0.0840068	0.0777581	0.058258	0.0211715	0.0617398	0.144512	3.47
151.	436.798	558.291	661.464	897.219	1030.28	1053.91	1104.05	1159.97	1201.43	1315.21	1334.5	1369.21	1427.55	1640.16	2892.7	3334.8	0.288349	0.376434	0.248016	0.0902893	0.508112	0.465142	0.241098	0.143192	0.0431351	0.0919436	0.0787684	0.072555	0.0547093	0.02137	0.0618678	0.145599	3.55
152.	433.905	557.327	662.91	896.737	1030.28	1053.91	1104.05	1159.97	1201.92	1315.21	1334.5	1369.69	1427.55	1636.79	2895.11	3332.39	0.311025	0.386786	0.260294	0.0962273	0.513436	0.473037	0.247758	0.148602	0.0450943	0.0949034	0.080407	0.0739938	0.0555764	0.0233346	0.0567101	0.147325	3.57
153.	436.798	557.809	663.875	896.737	1030.77	1053.91	1104.05	1160.45	1202.4	1315.21	1334.5	1369.69	1427.07	1640.64	2892.7	3332.87	0.280417	0.349403	0.246133	0.0979262	0.453793	0.427008	0.233829	0.144658	0.0484145	0.0962574	0.0822524	0.0757552	0.0580799	0.0275027	0.0516408	0.147609	3.61
154.	432.941	557.327	661.464	896.737	1030.28	1053.91	1104.05	1159.97	1201.92	1315.21	1334.5	1369.21	1427.55	1636.79	2895.11	3331.91	0.301079	0.381939	0.254572	0.0979136	0.518606	0.474523	0.248024	0.147846	0.0448256	0.0948051	0.0811718	0.0748326	0.0557079	0.0201815	0.0574396	0.148563	3.67
155.	435.834	557.327	661.946	896.737	1029.8	1053.91	1104.53	1159.97	1201.92	1315.21	1333.54	1369.69	1427.07	1640.64	2894.63	3334.32	0.304759	0.386041	0.257064	0.0961501	0.527381	0.481439	0.249793	0.148226	0.0445116	0.0946803	0.0805168	0.074285	0.0545754	0.0185428	0.0608108	0.150372	3.69
156.	437.28	557.327	663.393	896.737	1027.87	1053.91	1104.05	1159.97	1201.92	1315.21	1334.5	1369.21	1427.55	1640.16	2894.15	3331.91	0.313096	0.391487	0.258597	0.100895	0.5452	0.493088	0.254904	0.14902	0.0444836	0.096882	0.0824517	0.0759491	0.0558358	0.0174251	0.0610387	0.150467	3.7
157.	437.28	557.327	663.393	896.737	1027.87	1053.91	1104.05	1159.97	1201.92	1315.21	1334.5	1369.21	1427.55	1640.16	2894.15	3331.91	0.313096	0.391487	0.258597	0.100895	0.5452	0.493088	0.254904	0.14902	0.0444836	0.096882	0.0824517	0.0759491	0.0558358	0.0174251	0.0610387	0.150467	3.71
158.	432.941	557.809	661.464	897.219	1030.28	1053.91	1104.05	1159.97	1201.92	1315.21	1334.02	1369.69	1427.07	1640.64	2893.18	3332.39	0.325102	0.40941	0.272857	0.102352	0.535843	0.490477	0.257812	0.156012	0.0513753	0.10133	0.0866381	0.0805217	0.0615079	0.0282096	0.0598206	0.153014	3.72
159.	433.423	557.327	663.393	896.255	1030.28	1053.91	1104.05	1159.97	1201.92	1315.21	1334.02	1369.69	1426.58	1636.79	2895.59	3335.28	0.317402	0.404494	0.271877	0.10331	0.524995	0.485938	0.25655	0.157401	0.0509596	0.101744	0.0866623	0.0799423	0.0607294	0.0281582	0.0591242	0.155286	3.83
160.	436.316	557.327	661.464	897.219	1030.28	1053.91	1104.05	1159.97	1201.92	1315.21	1334.5	1369.69	1427.55	1640.64	2893.66	3332.39	0.320116	0.394939	0.271544	0.108921	0.507129	0.472225	0.255139	0.156999	0.0525265	0.104083	0.0888055	0.0816248	0.0625289	0.028382	0.0634533	0.159618	3.84
161.	433.905	557.327	661.464	896.737	1029.8	1053.42	1104.05	1159.97	1201.92	1315.21	1334.5	1369.69	1427.55	1636.79	2895.11	3332.39	0.322238	0.41179	0.275131	0.108293	0.549991	0.502278	0.26381	0.158549	0.0506085	0.104165	0.0890506	0.0819004	0.0623767	0.0259893	0.0642132	0.161951	3.86
162.	433.423	557.327	663.875	897.219	1027.87	1053.42	1103.57	1159.49	1201.43	1315.21	1334.5	1367.28	1428.03	1640.64	2893.66	3331.43	0.333201	0.421169	0.27467	0.11621	0.618385	0.546797	0.283897	0.164373	0.0523709	0.107891	0.0930432	0.0856518	0.0626745	0.0155559	0.0648631	0.163683	3.87
163.	440.655	557.327	661.464	897.219	1029.8	1053.91	1104.05	1159.97	1201.92	1315.21	1334.02	1369.69	1427.07	1640.64	2893.66	3334.32	0.329205	0.418749	0.280225	0.110916	0.56817	0.517029	0.272558	0.164013	0.0560234	0.107794	0.0930517	0.0858348	0.0652368	0.026365	0.0666001	0.164202	3.88
164.	436.798	557.327	661.946	896.737	1029.8	1053.42	1104.05	1159.97	1201.92	1315.21	1334.5	1369.21	1428.03	1640.64	2893.66	3333.36	0.322416	0.419104	0.275989	0.108608	0.571987	0.519741	0.272415	0.161864	0.0504255	0.105849	0.0903349	0.082707	0.0620415	0.0204443	0.0640037	0.164286	4.01
165.	436.316	557.327	662.91	896.737	1029.8	1053.91	1104.05	1159.97	1201.92	1315.21	1334.02	1369.69	1427.55	1640.16	2893.66	3331.91	0.346689	0.432057	0.289272	0.108484	0.561799	0.514761	0.269369	0.163254	0.0534554	0.106414	0.0907871	0.0839756	0.0639724	0.028956	0.0647609	0.164748	4.06
166.	436.316	557.327	660.982	896.255	1030.28	1053.91	1104.05	1159.97	1202.4	1315.21	1334.5	1369.69	1427.55	1640.64	2895.59	3333.36	0.343706	0.41741	0.285468	0.10943	0.532658	0.492862	0.263666	0.162192	0.0545228	0.107297	0.0918084	0.0845893	0.0656534	0.0324461	0.0663353	0.165472	4.12
167.	435.834	557.327	661.464	896.737	1028.36	1053.91	1104.05	1159.97	1201.92	1315.21	1334.02	1369.21	1427.55	1637.27	2895.11	3332.39	0.339196	0.420167	0.279011	0.11016	0.575532	0.522685	0.272713	0.162731	0.0526198	0.107296	0.0917227	0.0846451	0.0637028	0.0248294	0.0675238	0.165567	4.13
168.	435.351	556.845	661.946	896.255	1030.77	1053.91	1105.01	1160.45	1202.4	1314.73	1142.13	1369.69	1427.55	1644.02	2897.52	3332.39	0.282812	0.343136	0.247601	0.101975	0.398262	0.381663	0.217348	0.141879	0.0493137	0.100033	0.0850004	0.0778389	0.0617135	0.0378126	0.0700578	0.166486	4.14
169.	436.316	556.845	661.946	896.737	1029.8	1053.42	1104.05	1159.49	1201.92	1315.21	1334.5	1369.69	1427.55	1640.16	2895.11	3332.39	0.322688	0.40903	0.270034	0.103741	0.554848	0.503607	0.260147	0.15321	0.044747	0.100181	0.0851074	0.0777352	0.0577698	0.0203107	0.0675229	0.166529	4.15
170.	433.905	557.327	663.393	897.219	1030.28	1053.91	1104.05	1159.97	1202.4	1315.21	1334.5	1369.69	1427.55	1640.64	2895.59	3333.84	0.341183	0.426026	0.286404	0.103681	0.550199	0.50699	0.26516	0.161256	0.0501204	0.104808	0.0885887	0.0814335	0.0622099	0.0287624	0.0625907	0.168212	4.18
171.	437.28	557.327	660.982	896.737	1030.28	1053.91	1104.05	1159.97	1202.4	1315.21	1334.02	1369.69	1427.55	1640.64	2896.56	3334.32	0.317576	0.393728	0.276072	0.118286	0.508491	0.47461	0.260464	0.162074	0.0564624	0.110448	0.0946678	0.0875531	0.0674566	0.0324789	0.0671783	0.169402	4.19
172.	432.941	557.327	663.393	896.737	1030.28	1053.42	1104.05	1159.97	1201.43	1314.73	1333.54	1369.69	1427.07	1636.79	2895.11	3334.8	0.335391	0.407947	0.281139	0.117325	0.531441	0.492416	0.267165	0.164977	0.0489638	0.111051	0.093392	0.0780768	0.0645657	0.03011	0.0683223	0.171947	4.23
173.	433.905	557.327	661.946	896.737	1030.28	1053.42	1104.05	1159.97	1202.4	1315.21	1334.5	1369.69	1427.55	1640.64	2896.07	3334.8	0.348349	0.440323	0.290938	0.107128	0.569579	0.52032	0.269419	0.161041	0.0499774	0.10612	0.0897988	0.0826634	0.0622083	0.0263573	0.0681889	0.172343	4.26
174.	436.316	556.845	661.464	896.737	1029.8	1053.42	1104.05	1159.97	1201.92	1315.21	1334.5	1369.69	1427.55	1640.64	2896.56	3332.87	0.36816	0.45154	0.301702	0.11498	0.588974	0.536613	0.280557	0.17108	0.0575546	0.112088	0.0962502	0.0880929	0.0670497	0.0302492	0.0682383	0.173012	4.3
175.	436.316	556.845	661.464	896.737	1029.8	1053.42	1104.05	1159.97	1202.4	1315.21	1334.02	1369.69	1427.07	1640.64	2896.07	3335.28	0.367843	0.450646	0.299023	0.111361	0.586752	0.535452	0.278299	0.167265	0.0513417	0.109127	0.0920277	0.0844559	0.0636374	0.0273211	0.0648225	0.175421	4.37
176.	433.905	557.327	661.946	897.219	1027.87	1053.42	1104.05	1159.97	1201.92	1315.21	1334.5	1369.69	1427.55	1640.16	2893.66	3332.87	0.35724	0.445226	0.29737	0.120623	0.60616	0.546516	0.287006	0.171994	0.0576365	0.114451	0.0981465	0.0905288	0.0686283	0.0272642	0.0696525	0.176346	4.4
177.	434.51	557.327	661.946	896.737	1028.36	1053.42	1104.05	1159.97	1201.92	1315.21	1334.5	1369.69	1427.55	1640.16	2895.59	3332.87	0.352859	0.446464	0.293821	0.114083	0.595603	0.538849	0.28066	0.167459	0.0529991	0.110607	0.0938123	0.0860243	0.0647043	0.0247788	0.0657607	0.176918	4.56
178.	437.28	556.845	660.982	896.737	1030.28	1053.91	1104.05	1159.97	1201.92	1315.21	1334.02	1369.69	1427.55	1640.64	2896.07	3334.8	0.348783	0.425884	0.286076	0.110777	0.551279	0.507057	0.267167	0.161365	0.0490239	0.107533	0.0906002	0.0825901	0.0624427	0.0262757	0.0698897	0.178375	4.6
179.	432.941	556.845	661.946	896.255	1030.28	1053.42	1104.05	1159.97	1201.92	1315.21	1334.02	1369.69	1427.07	1640.16	2895.59	3334.32	0.366028	0.444379	0.301858	0.120035	0.568713	0.525064	0.280067	0.173212	0.0582639	0.116319	0.0990975	0.0903045	0.0708336	0.0353135	0.0711509	0.178861	4.64
180.	437.28	556.845	664.357	896.737	1028.84	1053.42	1104.05	1159.97	1202.4	1315.21	1334.02	1369.21	1427.55	1643.54	2894.15	3333.36	0.358015	0.443492	0.296131	0.116517	0.578883	0.52566	0.27722	0.166714	0.0548233	0.111945	0.0957442	0.0877847	0.0664017	0.0277	0.0729222	0.178915	4.74
181.	433.905	557.327	661.464	896.737	1029.8	1053.91	1104.05	1159.97	1201.92	1315.21	1334.5	1369.69	1427.55	1640.16	2894.15	3334.32	0.358195	0.450929	0.30068	0.111721	0.58241	0.531856	0.276314	0.166678	0.053651	0.110905	0.0943975	0.0868331	0.0659599	0.029617	0.0706161	0.179197	4.76
182.	432.941	556.845	661.464	896.737	1029.8	1053.42	1104.05	1159.97	1202.4	1315.21	1334.02	1369.69	1427.55	1640.64	2895.59	3334.8	0.37421	0.455701	0.304836	0.116756	0.596989	0.544499	0.284884	0.171068	0.0544229	0.113308	0.0959495	0.0878537	0.0664852	0.0282633	0.0676077	0.181141	4.77
183.	433.423	556.845	660.982	896.737	1029.8	1053.42	1104.05	1159.97	1201.92	1315.21	1334.5	1369.69	1427.55	1640.64	2895.11	3334.8	0.376445	0.466376	0.31206	0.120459	0.619437	0.558875	0.292041	0.175776	0.0590793	0.116579	0.0997745	0.0920419	0.0699256	0.0301619	0.0709186	0.181753	4.78
184.	433.423	556.845	661.946	896.737	1029.8	1053.42	1104.05	1159.97	1202.4	1315.21	1334.02	1369.69	1427.55	1640.64	2896.07	3334.8	0.370099	0.462066	0.308454	0.118505	0.600555	0.547977	0.286679	0.173484	0.0567334	0.115851	0.0983661	0.0900607	0.0692955	0.0314073	0.0697779	0.182269	4.81
185.	436.316	556.363	660.982	896.255	1030.28	1053.42	1104.05	1159.97	1201.92	1315.21	1334.5	1369.69	1427.55	1640.64	2895.11	3334.8	0.394323	0.472811	0.315904	0.124746	0.61386	0.556883	0.292482	0.177388	0.0600905	0.119514	0.1016	0.0938616	0.0710233	0.0312985	0.0711764	0.183908	4.85
186.	436.798	556.845	661.464	896.737	1029.8	1053.42	1104.05	1159.97	1202.4	1315.21	1334.5	1369.69	1427.55	1640.16	2895.11	3332.39	0.373235	0.46104	0.307032	0.118181	0.601271	0.547773	0.285451	0.17222	0.0549527	0.115236	0.0974953	0.0895513	0.068547	0.0301151	0.0721021	0.184657	4.88
187.	433.423	557.327	660.982	896.737	1027.87	1053.42	1104.05	1159.97	1201.92	1315.21	1334.5	1369.21	1428.03	1640.64	2895.11	3332.39	0.376541	0.459959	0.306469	0.125027	0.614695	0.554601	0.291647	0.173829	0.0561489	0.117358	0.0999029	0.0915824	0.0694691	0.0261058	0.0703276	0.184703	4.9
188.	436.798	556.845	661.464	896.737	1029.8	1053.42	1104.05	1159.97	1201.92	1315.21	1334.5	1369.69	1427.55	1643.54	2896.07	3332.87	0.359081	0.447382	0.301363	0.117998	0.584641	0.535322	0.280939	0.169189	0.0530776	0.114303	0.0968867	0.0888857	0.0670451	0.0287794	0.0715123	0.184851	4.9
189.	433.905	556.845	661.464	896.255	1028.36	1053.42	1104.05	1159.97	1201.92	1315.21	1334.5	1369.69	1427.55	1640.64	2894.63	3333.84	0.381442	0.46846	0.305227	0.117205	0.617744	0.557104	0.286829	0.170094	0.0513851	0.113186	0.0954501	0.0877196	0.0653742	0.0249404	0.0720296	0.187128	4.92
190.	436.316	557.327	661.464	896.737	1028.36	1053.42	1104.05	1159.97	1201.92	1315.21	1334.5	1369.21	1428.03	1640.64	2895.11	3332.39	0.355315	0.43758	0.291647	0.122086	0.591229	0.535639	0.282184	0.168129	0.0531964	0.114787	0.0977577	0.0896158	0.0670271	0.022929	0.0762993	0.189534	4.93
191.	436.316	557.327	661.464	896.737	1027.87	1053.42	1104.05	1159.97	1201.92	1315.21	1334.5	1369.69	1427.55	1640.64	2896.56	3331.91	0.389564	0.481233	0.318748	0.119067	0.620855	0.565606	0.293455	0.177619	0.0585528	0.118911	0.101045	0.0928146	0.0708188	0.0321459	0.073929	0.190792	4.98
192.	433.905	557.327	660.982	896.737	1027.87	1053.42	1104.05	1159.97	1201.92	1315.21	1334.5	1369.69	1427.55	1640.16	2895.59	3332.39	0.397119	0.478723	0.31902	0.127461	0.635952	0.573074	0.299145	0.179683	0.0585129	0.121062	0.10278	0.0943164	0.0712403	0.02967	0.0722472	0.19192	4.98
193.	433.905	556.845	663.875	896.737	1030.28	1053.42	1104.05	1159.97	1202.4	1315.21	1334.5	1369.69	1427.55	1636.79	2894.63	3335.28	0.403901	0.486199	0.320738	0.11877	0.619978	0.563616	0.292401	0.176841	0.0567307	0.118351	0.0997653	0.0914855	0.0692928	0.0311712	0.0736621	0.193245	4.99
194.	433.905	557.327	661.464	896.737	1029.8	1053.42	1104.05	1159.97	1202.4	1315.21	1334.5	1369.69	1427.55	1636.79	2896.07	3333.36	0.397512	0.482875	0.322011	0.125589	0.623991	0.567756	0.296389	0.178543	0.0586655	0.121282	0.102847	0.0942959	0.0713574	0.0312323	0.0768865	0.196275	5.05
195.	436.316	557.327	661.464	896.737	1030.28	1053.91	1104.05	1159.97	1202.4	1315.7	1334.5	1369.69	1427.55	1640.64	2895.59	3332.39	0.358005	0.438706	0.309139	0.134207	0.555019	0.516574	0.284855	0.177558	0.0643697	0.124965	0.106986	0.0987346	0.0765433	0.0374475	0.0797752	0.19684	5.08
196.	436.798	557.327	660.982	896.737	1029.8	1053.42	1104.05	1159.97	1201.92	1315.21	1334.5	1369.69	1427.55	1640.64	2895.11	3333.36	0.394932	0.480558	0.321877	0.128887	0.620622	0.56675	0.298563	0.181444	0.059589	0.123113	0.104221	0.0953196	0.0725244	0.032257	0.0733428	0.19819	5.1
197.	433.423	557.327	660.982	896.737	1028.36	1053.42	1104.05	1159.97	1202.4	1315.21	1334.5	1369.69	1427.55	1640.16	2896.07	3334.32	0.397878	0.481016	0.324772	0.133548	0.629807	0.57388	0.304195	0.185147	0.0636317	0.127589	0.108679	0.0998321	0.0765491	0.0342902	0.0773304	0.200992	5.15
198.	433.905	556.845	661.464	896.255	1029.8	1053.42	1104.05	1159.97	1202.4	1315.21	1334.5	1369.69	1427.55	1637.27	2896.07	3333.84	0.415986	0.503561	0.335576	0.131098	0.652855	0.591685	0.30953	0.187934	0.0633927	0.127192	0.107842	0.0990884	0.075672	0.0354259	0.0762444	0.203097	5.19
199.	436.316	556.845	661.464	896.737	1027.87	1053.42	1104.05	1159.97	1201.92	1315.21	1334.5	1369.21	1428.03	1640.16	2896.07	3333.84	0.404175	0.496781	0.330513	0.13185	0.652254	0.588054	0.307418	0.185467	0.0616479	0.126097	0.107065	0.0985081	0.0749371	0.0323543	0.0755207	0.203152	5.21
200.	433.423	556.845	661.464	896.737	1029.8	1053.42	1104.05	1159.97	1201.92	1315.21	1334.5	1369.69	1427.55	1640.64	2895.59	3334.32	0.397205	0.476749	0.324694	0.136711	0.611013	0.560654	0.301608	0.185423	0.0640032	0.12902	0.110071	0.100102	0.0780242	0.0374879	0.0791677	0.203601	5.38
201.	436.316	557.327	661.464	896.737	1030.28	1053.91	1104.05	1159.97	1202.4	1315.21	1334.98	1369.69	1427.55	1640.64	2895.59	3332.39	0.370049	0.445854	0.312558	0.144024	0.57584	0.531725	0.294806	0.183374	0.0683328	0.130991	0.112887	0.104695	0.0814332	0.0380575	0.0822785	0.204439	5.42
202.	436.798	556.845	661.464	896.737	1028.36	1053.42	1104.05	1159.97	1202.4	1315.21	1334.5	1369.69	1427.55	1640.64	2896.07	3332.87	0.412182	0.495425	0.330979	0.129785	0.645346	0.584001	0.304594	0.185189	0.0608794	0.125026	0.1062	0.097311	0.0743635	0.0338415	0.0743626	0.204584	5.43
203.	433.423	556.845	660.982	896.255	1029.8	1053.42	1104.53	1159.97	1202.4	1315.21	1334.5	1369.69	1427.55	1636.79	2897.52	3331.91	0.424105	0.507848	0.33681	0.130638	0.641367	0.583818	0.307098	0.188105	0.0642182	0.127907	0.108243	0.099576	0.076456	0.0385939	0.0775048	0.206611	5.46
204.	436.316	556.845	660.982	896.737	1027.87	1053.42	1104.05	1159.97	1201.92	1315.21	1334.02	1369.69	1427.55	1636.79	2896.07	3331.91	0.420204	0.514439	0.339167	0.133391	0.655247	0.593543	0.311748	0.189652	0.064906	0.129088	0.109835	0.101328	0.0775289	0.0373259	0.078559	0.20885	5.46
205.	433.423	556.845	660.982	896.737	1029.8	1053.42	1104.05	1159.97	1202.4	1315.21	1334.5	1369.69	1427.55	1636.79	2896.07	3332.87	0.423024	0.509708	0.340533	0.135333	0.652462	0.593041	0.311825	0.189489	0.0628276	0.129301	0.10925	0.0997321	0.0759495	0.0348426	0.0762602	0.209293	5.52
206.	436.798	557.327	661.464	896.737	1029.8	1053.42	1104.05	1159.97	1202.4	1315.21	1334.02	1369.69	1427.55	1640.16	2895.11	3332.39	0.407728	0.499701	0.340265	0.144655	0.64449	0.586603	0.316588	0.194906	0.070495	0.135505	0.116191	0.105956	0.0825797	0.0399802	0.0835735	0.210885	5.58
207.	436.316	556.845	661.464	896.737	1028.36	1053.42	1104.05	1159.97	1202.4	1315.21	1334.5	1369.69	1428.03	1643.54	2896.07	3332.39	0.405828	0.498387	0.332872	0.137106	0.648267	0.588881	0.310457	0.187999	0.0625255	0.131351	0.111117	0.101718	0.0775402	0.0333873	0.084044	0.214619	5.61
208.	436.316	556.845	661.464	896.737	1027.87	1053.42	1104.05	1159.97	1202.4	1315.21	1334.5	1369.69	1428.03	1640.64	2896.56	3332.87	0.42214	0.509515	0.341948	0.142158	0.668633	0.601372	0.317058	0.192218	0.065328	0.133028	0.11314	0.104093	0.0793998	0.034398	0.0800657	0.214901	5.62
209.	433.905	557.327	662.428	897.219	1029.8	1053.42	1104.05	1159.97	1202.88	1315.21	1334.98	1369.69	1428.51	1643.05	2896.56	3333.36	0.374586	0.469705	0.320583	0.129282	0.59608	0.551019	0.293704	0.18177	0.0622515	0.128492	0.108658	0.100011	0.0775448	0.0391025	0.0847367	0.217462	5.64
210.	432.941	556.845	660.982	896.737	1027.87	1053.42	1103.57	1159.97	1202.4	1315.21	1334.5	1369.69	1427.55	1640.64	2896.07	3332.39	0.435762	0.521627	0.35153	0.146699	0.678536	0.612613	0.32522	0.199479	0.0716003	0.13856	0.118652	0.109608	0.0846584	0.0412711	0.0842863	0.218244	5.75
211.	440.655	556.845	660.982	896.737	1030.28	1053.42	1104.05	1159.97	1202.4	1315.21	1334.02	1369.69	1427.55	1640.16	2896.07	3332.39	0.442674	0.540184	0.361044	0.146316	0.671454	0.613061	0.325086	0.200528	0.0706766	0.139139	0.117706	0.107528	0.0833289	0.0430036	0.0819907	0.218313	5.76
212.	436.798	556.363	660.982	896.737	1028.36	1053.42	1104.05	1159.97	1201.92	1315.21	1334.5	1369.69	1427.07	1636.79	2895.59	3334.8	0.436495	0.521829	0.350478	0.146105	0.67158	0.608018	0.323093	0.19829	0.0703552	0.137545	0.116972	0.108104	0.0826478	0.0389814	0.0828709	0.219972	5.9
213.	433.423	556.845	660.982	897.219	1030.28	1053.42	1104.53	1159.97	1202.88	1315.21	1334.5	1369.69	1427.55	1640.16	2897.04	3334.8	0.419216	0.499477	0.344017	0.132999	0.599717	0.558693	0.29981	0.188594	0.0640046	0.129235	0.108939	0.0996891	0.0776529	0.046742	0.0759644	0.220998	5.98
214.	433.423	556.845	661.464	896.737	1029.8	1053.42	1104.05	1159.97	1202.4	1315.21	1334.5	1369.69	1427.55	1640.16	2896.07	3334.32	0.44023	0.522698	0.352535	0.141526	0.655899	0.597042	0.315827	0.19379	0.0650947	0.134305	0.113432	0.103897	0.0795585	0.0399616	0.082364	0.222854	6.22
215.	436.798	556.363	660.982	896.737	1027.87	1052.94	1103.57	1159.97	1202.4	1315.21	1334.5	1369.69	1427.55	1640.16	2895.59	3334.32	0.45666	0.541181	0.356841	0.144645	0.704912	0.631998	0.32962	0.19885	0.0665346	0.137314	0.115886	0.106416	0.0808323	0.0353706	0.0820978	0.224312	6.24
216.	433.423	556.845	660.982	896.737	1027.87	1052.94	1104.05	1159.97	1202.4	1315.21	1334.02	1369.69	1427.55	1636.79	2896.07	3333.36	0.471378	0.551563	0.366097	0.150255	0.716982	0.641085	0.336496	0.205029	0.0724048	0.142475	0.120982	0.111142	0.0854962	0.0400686	0.0848321	0.226744	6.35
217.	436.798	556.845	661.464	896.737	1027.87	1053.42	1104.05	1159.97	1202.4	1315.21	1334.5	1369.69	1427.55	1640.64	2896.56	3332.39	0.427581	0.514709	0.347459	0.146075	0.651506	0.59303	0.315447	0.193064	0.0655739	0.13634	0.115382	0.105982	0.0818307	0.0386711	0.086414	0.228348	6.37
218.	433.905	556.845	660.982	896.737	1030.28	1053.91	1104.53	1160.45	1202.88	1315.21	1334.5	1369.69	1428.03	1640.16	2896.56	3332.39	0.43073	0.510911	0.352198	0.134905	0.614642	0.571058	0.304753	0.190433	0.0643223	0.13223	0.111286	0.101833	0.0785509	0.0459333	0.0828107	0.229334	6.39
219.	436.316	557.327	660.982	896.255	1027.87	1052.94	1104.05	1159.97	1201.43	1315.21	1334.02	1369.69	1427.55	1640.64	2896.07	3332.39	0.463663	0.54828	0.371073	0.160131	0.69635	0.630395	0.338252	0.208262	0.0768803	0.147931	0.126353	0.115673	0.0902132	0.0458278	0.0888775	0.233257	6.4
220.	437.28	556.845	660.982	896.737	1027.87	1053.42	1104.05	1159.97	1202.4	1315.7	1334.5	1369.69	1428.03	1640.64	2896.56	3331.91	0.425363	0.508078	0.350889	0.16076	0.66032	0.602714	0.328986	0.203898	0.0767084	0.147549	0.126603	0.116866	0.0925191	0.0440092	0.0919356	0.234678	6.63
221.	432.941	556.845	660.982	896.737	1027.87	1052.94	1104.05	1159.97	1201.92	1315.21	1334.5	1369.69	1428.03	1640.16	2896.07	3331.91	0.444241	0.539243	0.360127	0.150657	0.702458	0.629232	0.331074	0.19913	0.0673651	0.140348	0.119132	0.109162	0.0831695	0.0360105	0.0868399	0.235421	6.65
222.	436.316	556.845	660.982	896.255	1029.8	1053.42	1104.05	1159.97	1201.92	1315.21	1334.5	1369.69	1427.55	1640.16	2897.52	3332.39	0.466955	0.552762	0.370549	0.15458	0.712436	0.640863	0.339062	0.208873	0.0747362	0.146332	0.12504	0.113847	0.0894511	0.0456032	0.0886898	0.237527	6.69
223.	436.798	556.845	661.464	896.255	1027.87	1053.42	1104.05	1159.97	1202.4	1315.21	1334.5	1369.69	1428.03	1640.16	2896.07	3332.87	0.454962	0.552134	0.364184	0.148552	0.710615	0.637225	0.333564	0.199906	0.065776	0.140958	0.118759	0.108049	0.0819809	0.0355207	0.0870681	0.238276	6.91
224.	433.423	556.845	660.982	896.737	1027.39	1052.46	1103.57	1159.49	1201.92	1315.21	1334.5	1369.21	1428.03	1640.64	2895.11	3332.39	0.465775	0.556419	0.369611	0.16235	0.756631	0.665496	0.349307	0.210268	0.0741444	0.148933	0.127196	0.115896	0.0893846	0.0358705	0.0895813	0.240995	7.09
225.	436.798	556.845	660.982	896.737	1030.28	1053.91	1104.53	1160.45	1202.88	1315.7	1334.98	1369.69	1428.03	1640.64	2897.04	3332.87	0.427303	0.517547	0.361555	0.144127	0.627489	0.585379	0.318897	0.199914	0.071043	0.141976	0.119844	0.10993	0.0859569	0.0497848	0.08396	0.245664	7.58
226.	433.423	556.363	660.982	896.255	1030.28	1053.42	1104.53	1159.97	1202.88	1315.21	1334.98	1369.69	1428.03	1644.02	2898	3334.8	0.479227	0.561989	0.377352	0.142966	0.669463	0.614893	0.324122	0.201196	0.0662237	0.140844	0.118017	0.107737	0.0837809	0.0514493	0.0853957	0.255	7.69
227.	436.316	556.845	660.982	896.255	1030.28	1053.42	1104.05	1160.45	1202.88	1315.21	1334.98	1369.69	1428.03	1640.64	2897.52	3332.39	0.505777	0.586766	0.393951	0.148711	0.717465	0.652326	0.340105	0.208032	0.068332	0.144036	0.120407	0.110174	0.0839848	0.046287	0.0824145	0.262039	8.06
228.	436.316	556.845	660.982	896.255	1030.28	1053.42	1104.53	1160.45	1202.88	1315.21	1334.5	1369.69	1427.55	1636.3	2897.04	3331.43	0.495376	0.571679	0.388859	0.154687	0.683215	0.625956	0.336114	0.208365	0.0715282	0.147757	0.124193	0.112792	0.0877748	0.0514107	0.0933699	0.263234	8.11
229.	433.905	556.363	660.982	896.737	1030.28	1053.42	1104.53	1160.45	1202.4	1315.21	1334.5	1369.69	1428.03	1640.64	2898.97	3334.32	0.483946	0.564723	0.38754	0.154423	0.683684	0.630524	0.338967	0.21325	0.0775495	0.151564	0.128412	0.118143	0.0935575	0.0575236	0.0908142	0.263776	8.14
230.	432.941	556.363	661.464	896.737	1030.28	1053.42	1104.05	1160.45	1202.88	1315.21	1334.5	1369.69	1428.03	1640.16	2898	3333.84	0.49121	0.579194	0.394906	0.157981	0.718685	0.655279	0.350253	0.216968	0.0780465	0.154654	0.130648	0.119577	0.0936863	0.0532895	0.0915756	0.26462	8.27
231.	433.423	556.845	660.982	896.737	1027.39	1051.98	1103.57	1159.97	1202.4	1315.21	1334.5	1369.69	1428.03	1640.64	2896.07	3332.87	0.495002	0.589569	0.393298	0.17316	0.787825	0.691805	0.362775	0.217617	0.0767125	0.157349	0.133927	0.12265	0.0936779	0.0397638	0.0969235	0.268091	8.34
232.	432.941	556.845	660.982	896.255	1030.28	1053.42	1104.53	1160.45	1202.88	1315.21	1334.98	1369.69	1428.03	1640.64	2898.49	3333.84	0.495724	0.575159	0.397266	0.152793	0.692975	0.636234	0.336416	0.214726	0.0775946	0.15196	0.128491	0.118155	0.0925977	0.0570554	0.0894413	0.269093	8.53
233.	436.798	556.363	660.5	896.255	1030.28	1053.42	1104.05	1160.45	1202.88	1315.21	1334.5	1369.69	1428.03	1640.16	2898.49	3333.36	0.51952	0.604251	0.403789	0.150298	0.717697	0.654228	0.343481	0.212799	0.0718751	0.147992	0.123676	0.112986	0.0867857	0.0528933	0.084925	0.271338	8.59
234.	435.834	556.845	660.982	896.255	1027.39	1052.46	1103.57	1159.97	1202.4	1315.21	1334.5	1369.69	1427.55	1640.16	2896.07	3331.91	0.510749	0.603358	0.400402	0.170828	0.793374	0.699397	0.364788	0.221623	0.0788115	0.158577	0.134995	0.124167	0.094786	0.0446969	0.0985217	0.272037	8.77
235.	432.941	556.363	660.982	896.737	1029.8	1052.94	1104.05	1159.97	1202.4	1315.21	1334.5	1369.69	1427.55	1640.16	2897.04	3334.8	0.538941	0.625376	0.415923	0.162477	0.752687	0.682469	0.356704	0.220255	0.0760646	0.155573	0.130432	0.119081	0.0915235	0.0520358	0.0939543	0.280074	8.8
236.	436.316	557.327	660.982	896.737	1029.8	1053.42	1104.05	1160.45	1202.88	1315.21	1334.5	1369.69	1428.03	1640.16	2898.49	3332.39	0.492659	0.57307	0.396332	0.167644	0.708402	0.649392	0.352507	0.222169	0.0834629	0.1613	0.136882	0.126207	0.0990707	0.0565162	0.0973704	0.281357	8.87
237.	432.941	556.845	661.464	896.737	1030.28	1053.42	1104.05	1160.45	1202.88	1315.21	1334.98	1369.69	1428.03	1640.64	2898	3332.87	0.505877	0.599117	0.408687	0.16208	0.725234	0.662583	0.352244	0.219994	0.0771511	0.156451	0.131738	0.120633	0.0939359	0.0563908	0.0915969	0.282684	8.94
238.	436.316	556.363	660.982	896.255	1029.8	1053.42	1104.05	1159.97	1202.4	1315.21	1334.5	1369.69	1427.55	1640.16	2898	3333.84	0.515238	0.609119	0.40853	0.16473	0.738314	0.669294	0.353287	0.217577	0.0757011	0.154873	0.13038	0.119336	0.0913548	0.0532657	0.0952137	0.284338	9.07
239.	433.905	556.845	660.982	896.255	1030.28	1053.42	1104.53	1160.45	1201.92	1315.21	1334.5	1369.69	1427.55	1640.64	2897.52	3331.91	0.537433	0.627845	0.41967	0.163067	0.745305	0.67772	0.356458	0.221964	0.0783448	0.156776	0.131905	0.120804	0.0938128	0.0579342	0.0925835	0.285922	9.15
240.	433.905	556.845	660.982	896.737	1030.28	1053.42	1104.05	1160.45	1202.88	1315.21	1334.98	1369.69	1428.03	1644.02	2898	3332.39	0.533908	0.628335	0.420328	0.165035	0.744705	0.677983	0.358244	0.222877	0.0790067	0.159702	0.134271	0.122422	0.095716	0.0585765	0.0963716	0.28874	9.24
241.	436.316	559.737	664.839	898.183	1030.77	1054.87	1104.53	1160.94	1200.95	1315.21	1333.54	1366.8	1427.07	1640.64	2894.63	3335.28	0.533908	0.628335	0.420328	0.165035	0.744705	0.677983	0.358244	0.222877	0.0790067	0.159702	0.134271	0.122422	0.095716	0.0585765	0.0963716	0.28874	9.44
242.	433.905	556.845	660.982	896.255	1029.8	1053.42	1104.05	1159.97	1202.88	1315.21	1334.5	1369.69	1428.03	1640.64	2898	3332.87	0.550339	0.627542	0.422346	0.163009	0.747442	0.679715	0.3573	0.221582	0.077151	0.156294	0.131255	0.119809	0.0929159	0.0586654	0.0910977	0.29226	9.61
243.	436.798	556.845	660.982	896.255	1030.28	1053.42	1104.05	1160.45	1202.88	1315.21	1334.98	1369.69	1428.03	1640.16	2898.49	3334.32	0.542958	0.626057	0.422654	0.16683	0.748712	0.682199	0.360979	0.225521	0.0804683	0.161551	0.135951	0.124464	0.0970661	0.0612345	0.0966875	0.292671	9.62
244.	436.798	556.845	660.982	896.255	1030.28	1053.42	1104.05	1160.45	1202.4	1315.21	1334.5	1369.69	1428.03	1640.64	2898.49	3331.91	0.507403	0.602694	0.414837	0.174425	0.7314	0.66812	0.360524	0.227357	0.084785	0.165307	0.140245	0.128699	0.102175	0.0621013	0.0983019	0.293069	9.77
245.	432.941	556.845	660.982	896.255	1027.87	1052.94	1104.05	1159.97	1202.88	1315.21	1334.5	1369.69	1427.55	1640.64	2896.56	3334.32	0.560795	0.644825	0.434311	0.182138	0.804242	0.719866	0.379453	0.234959	0.0867158	0.170027	0.143894	0.131711	0.101546	0.0562472	0.103261	0.299098	9.78
246.	436.316	556.363	660.982	896.255	1030.28	1053.42	1104.05	1159.97	1202.4	1315.21	1334.5	1369.69	1427.55	1640.16	2898.49	3334.32	0.548456	0.630709	0.425875	0.17153	0.745932	0.679109	0.361188	0.225459	0.0805378	0.161253	0.135905	0.123737	0.0965001	0.0626346	0.0940595	0.300701	9.89
247.	433.423	556.363	660.982	896.255	1027.87	1052.94	1104.05	1159.97	1202.88	1315.21	1334.98	1369.69	1428.03	1643.54	2898.97	3332.39	0.583904	0.658161	0.440739	0.173939	0.795915	0.716953	0.375061	0.232364	0.0828975	0.168151	0.141104	0.128347	0.100448	0.0608567	0.0985257	0.305352	9.96
248.	436.798	556.363	660.982	896.255	1027.87	1052.94	1104.05	1160.45	1202.4	1315.21	1334.98	1369.69	1428.03	1640.64	2898.97	3331.43	0.59565	0.677747	0.453041	0.180547	0.831855	0.741935	0.386309	0.240105	0.0866908	0.174508	0.147158	0.135133	0.104717	0.0626721	0.106088	0.323238	10.13
249.	436.798	556.363	660.982	896.255	1027.87	1052.94	1104.05	1160.45	1202.88	1315.21	1334.98	1369.69	1428.03	1640.16	2898	3332.87	0.586859	0.66494	0.450466	0.181146	0.800508	0.723969	0.380727	0.237937	0.0853919	0.173742	0.146031	0.134078	0.105064	0.0671714	0.107332	0.330282	10.21
250.	433.905	555.881	660.5	896.255	1027.39	1051.5	1103.57	1159.49	1202.4	1314.25	1334.98	1361.98	1428.51	1645.46	2892.7	3331.91	0.700271	0.742313	0.476944	0.232883	0.867064	0.7541	0.391352	0.232609	0.0673047	0.184052	0.150809	0.136414	0.105272	0.056627	0.1544	0.337083	11.01

## Sheet: Exemplary function
399.675	0				Wavenumber [1/cm]	437.762	558.291	664.839	896.737	1030.28	1053.91	1104.05	1159.97	1200.95	1315.21	1333.54	1366.8	1426.58	1640.64	2891.25	3331.91
400.157	0.172517				Absorbance [-]	0.193549	0.26226	0.175387	0.0732274	0.417215	0.383374	0.203615	0.117793	0.0362474	0.0706465	0.0621405	0.0567054	0.0410301	0.00640633	0.0403483	0.0934561
400.639	0.171418
401.121	0.170141
401.603	0.168605
402.085	0.166774
402.567	0.164823
403.05	0.163123
403.532	0.162069
404.014	0.161886
404.496	0.162508
404.978	0.163577
405.46	0.16455
405.942	0.164958
406.424	0.164678
406.906	0.164036
407.389	0.163601
407.871	0.163854
408.353	0.164931
408.835	0.166189
409.317	0.167597
409.799	0.168417
410.281	0.168517
410.763	0.167971
411.245	0.167249
411.728	0.166872
412.21	0.16739
412.692	0.167998
413.174	0.16887
413.656	0.169644
414.138	0.170344
414.62	0.170414
415.103	0.170307
415.585	0.170296
416.067	0.170922
416.549	0.171918
417.031	0.173249
417.513	0.174504
417.995	0.175208
418.477	0.17486
418.959	0.173079
419.442	0.171248
419.924	0.170553
420.406	0.17051
420.888	0.171014
421.37	0.171425
421.852	0.171747
422.334	0.17218
422.816	0.172841
423.298	0.17391
423.781	0.175758
424.263	0.178024
424.745	0.180163
425.227	0.181651
425.709	0.182305
426.191	0.182103
426.673	0.181354
427.155	0.180957
427.637	0.181326
428.12	0.182306
428.602	0.183843
429.084	0.185282
429.566	0.18654
430.048	0.187652
430.53	0.188021
431.012	0.188404
431.494	0.189061
431.977	0.190003
432.459	0.191077
432.941	0.192161
433.423	0.192628
433.905	0.192625
434.387	0.192191
434.869	0.191723
435.351	0.191624
435.834	0.192089
436.316	0.192635
436.798	0.193159
437.28	0.193513
437.762	0.193549
438.244	0.19314
438.726	0.192274
439.208	0.191484
439.69	0.1906
440.173	0.189529
440.655	0.188334
441.137	0.186837
441.619	0.185269
442.101	0.184064
442.583	0.183342
443.065	0.183476
443.547	0.184297
444.029	0.185754
444.512	0.187409
444.994	0.188689
445.476	0.189608
445.958	0.190348
446.44	0.190607
446.922	0.190689
447.404	0.19077
447.886	0.190645
448.368	0.18992
448.851	0.188948
449.333	0.187634
449.815	0.186105
450.297	0.184747
450.779	0.183516
451.261	0.182641
451.743	0.182299
452.226	0.182181
452.708	0.182204
453.19	0.182956
453.672	0.18301
454.154	0.183055
454.636	0.183282
455.118	0.183587
455.6	0.183537
456.082	0.183196
456.565	0.182413
457.047	0.181608
457.529	0.18068
458.011	0.180238
458.493	0.180556
458.975	0.181598
459.457	0.182444
459.939	0.182806
460.421	0.182886
460.904	0.182431
461.386	0.18146
461.868	0.180512
462.35	0.179883
462.832	0.179721
463.314	0.180084
463.796	0.180401
464.278	0.180415
464.76	0.179965
465.243	0.179126
465.725	0.178231
466.207	0.177272
466.689	0.176541
467.171	0.176489
467.653	0.176525
468.135	0.176402
468.617	0.175987
469.099	0.175746
469.582	0.175278
470.064	0.174943
470.546	0.174809
471.028	0.174799
471.51	0.174688
471.992	0.174517
472.474	0.174531
472.957	0.174906
473.439	0.175711
473.921	0.177096
474.403	0.178938
474.885	0.180799
475.367	0.182548
475.849	0.183813
476.331	0.184559
476.813	0.184862
477.296	0.185145
477.778	0.185428
478.26	0.185672
478.742	0.186285
479.224	0.186812
479.706	0.187309
480.188	0.187531
480.67	0.187864
481.152	0.188384
481.635	0.189045
482.117	0.190045
482.599	0.191426
483.081	0.192671
483.563	0.193561
484.045	0.194173
484.527	0.194376
485.009	0.194369
485.491	0.194126
485.974	0.194344
486.456	0.194653
486.938	0.195072
487.42	0.195435
487.902	0.195664
488.384	0.195827
488.866	0.19608
489.348	0.19636
489.831	0.196904
490.313	0.197445
490.795	0.197982
491.277	0.19846
491.759	0.199414
492.241	0.199986
492.723	0.200746
493.205	0.201549
493.688	0.202153
494.17	0.202822
494.652	0.203006
495.134	0.202873
495.616	0.202554
496.098	0.202265
496.58	0.202264
497.062	0.202493
497.544	0.20317
498.027	0.203955
498.509	0.204204
498.991	0.204005
499.473	0.20329
499.955	0.202484
500.437	0.20178
500.919	0.201165
501.401	0.201114
501.884	0.201042
502.366	0.201393
502.848	0.201783
503.33	0.20248
503.812	0.203247
504.294	0.203869
504.776	0.204837
505.258	0.205912
505.74	0.206997
506.223	0.20784
506.705	0.208335
507.187	0.208105
507.669	0.207856
508.151	0.207596
508.633	0.207459
509.115	0.207592
509.597	0.208127
510.079	0.20898
510.562	0.209768
511.044	0.210858
511.526	0.212159
512.008	0.213572
512.49	0.215077
512.972	0.216821
513.454	0.218422
513.936	0.21973
514.418	0.220232
514.901	0.22057
515.383	0.220568
515.865	0.22058
516.347	0.220743
516.829	0.22109
517.311	0.22178
517.793	0.222322
518.275	0.223424
518.758	0.223413
519.24	0.223301
519.722	0.223187
520.204	0.223165
520.686	0.223213
521.168	0.223174
521.65	0.222934
522.132	0.222365
522.615	0.221481
523.097	0.220368
523.579	0.219292
524.061	0.218449
524.543	0.217879
525.025	0.217717
525.507	0.217667
525.989	0.217684
526.471	0.21766
526.954	0.217831
527.436	0.217977
527.918	0.21835
528.4	0.218854
528.882	0.21934
529.364	0.219743
529.846	0.21993
530.328	0.219866
530.811	0.219584
531.293	0.219201
531.775	0.218794
532.257	0.218379
532.739	0.217917
533.221	0.217334
533.703	0.216764
534.185	0.216046
534.667	0.215511
535.149	0.215342
535.632	0.215568
536.114	0.216081
536.596	0.216727
537.078	0.217384
537.56	0.217894
538.042	0.218259
538.524	0.218568
539.006	0.219003
539.489	0.219693
539.971	0.220462
540.453	0.221381
540.935	0.222251
541.417	0.222969
541.899	0.223244
542.381	0.223395
542.863	0.22352
543.346	0.22377
543.828	0.224195
544.31	0.224853
544.792	0.225662
545.274	0.22659
545.756	0.227664
546.238	0.228886
546.72	0.230346
547.202	0.232054
547.685	0.233907
548.167	0.23571
548.649	0.237346
549.131	0.238806
549.613	0.240146
550.095	0.241344
550.577	0.242662
551.059	0.244199
551.542	0.245912
552.024	0.24766
552.506	0.24921
552.988	0.25056
553.47	0.251547
553.952	0.252422
554.434	0.253418
554.916	0.254696
555.398	0.256251
555.881	0.257897
556.363	0.259515
556.845	0.26081
557.327	0.26167
557.809	0.262113
558.291	0.26226
558.773	0.262245
559.255	0.261824
559.737	0.261164
560.22	0.260007
560.702	0.258278
561.184	0.256056
561.666	0.253652
562.148	0.25108
562.63	0.248671
563.112	0.246508
563.594	0.24457
564.077	0.242762
564.559	0.240938
565.041	0.239045
565.523	0.237164
566.005	0.235407
566.487	0.233856
566.969	0.232507
567.451	0.231268
567.933	0.230017
568.416	0.22863
568.898	0.227268
569.38	0.225885
569.862	0.224678
570.344	0.223731
570.826	0.223035
571.308	0.222527
571.79	0.222007
572.273	0.221357
572.755	0.220624
573.237	0.219776
573.719	0.219024
574.201	0.218503
574.683	0.218269
575.165	0.218268
575.647	0.218376
576.13	0.218462
576.612	0.218461
577.094	0.218391
577.576	0.218323
578.058	0.218305
578.54	0.218329
579.022	0.21832
579.504	0.218185
579.986	0.217875
580.468	0.217433
580.951	0.216991
581.433	0.216709
581.915	0.216696
582.397	0.216954
582.879	0.217375
583.361	0.217799
583.843	0.218089
584.325	0.218193
584.808	0.218163
585.29	0.218105
585.772	0.218117
586.254	0.218225
586.736	0.218378
587.218	0.218467
587.7	0.218443
588.182	0.218333
588.664	0.218243
589.147	0.218307
589.629	0.218604
590.111	0.219104
590.593	0.219666
591.075	0.220094
591.557	0.220225
592.039	0.220016
592.521	0.219553
593.004	0.219003
593.486	0.218512
593.968	0.218135
594.45	0.21783
594.932	0.217493
595.414	0.217039
595.896	0.216451
596.378	0.215793
596.861	0.215173
597.343	0.214673
597.825	0.214303
598.307	0.213998
598.789	0.213658
599.271	0.213215
599.753	0.212676
600.235	0.212128
600.717	0.211686
601.199	0.211431
601.682	0.211359
602.164	0.211386
602.646	0.2114
603.128	0.21132
603.61	0.21115
604.092	0.210967
604.574	0.210881
605.057	0.210967
605.539	0.21122
606.021	0.211558
606.503	0.211866
606.985	0.212061
607.467	0.212135
607.949	0.212153
608.431	0.212207
608.913	0.212348
609.395	0.212551
609.878	0.212715
610.36	0.212718
610.842	0.212485
611.324	0.212037
611.806	0.21148
612.288	0.210963
612.77	0.210594
613.252	0.210396
613.735	0.210301
614.217	0.21019
614.699	0.209957
615.181	0.209559
615.663	0.20902
616.145	0.208403
616.627	0.207753
617.109	0.207057
617.591	0.206248
618.074	0.205247
618.556	0.204017
619.038	0.202596
619.52	0.201084
620.002	0.199598
620.484	0.198217
620.966	0.196946
621.448	0.195727
621.931	0.194474
622.413	0.193126
622.895	0.19168
623.377	0.190187
623.859	0.188721
624.341	0.187331
624.823	0.186019
625.305	0.184749
625.788	0.183483
626.27	0.182221
626.752	0.181021
627.234	0.179972
627.716	0.179144
628.198	0.178545
628.68	0.178096
629.162	0.177657
629.644	0.177082
630.126	0.176285
630.609	0.175276
631.091	0.174149
631.573	0.173029
632.055	0.172009
632.537	0.171106
633.019	0.170262
633.501	0.169384
633.984	0.168403
634.466	0.167319
634.948	0.166195
635.43	0.165128
635.912	0.164194
636.394	0.163412
636.876	0.162741
637.358	0.16212
637.84	0.161506
638.322	0.160904
638.805	0.160361
639.287	0.159926
639.769	0.15961
640.251	0.159359
640.733	0.159073
641.215	0.158658
641.697	0.158078
642.179	0.157384
642.662	0.156695
643.144	0.156142
643.626	0.1558
644.108	0.155647
644.59	0.155576
645.072	0.155452
645.554	0.155179
646.036	0.154758
646.519	0.154284
647.001	0.153898
647.483	0.153711
647.965	0.153748
648.447	0.153935
648.929	0.154146
649.411	0.154266
649.893	0.154263
650.375	0.154195
650.857	0.154174
651.34	0.154299
651.822	0.154603
652.304	0.155043
652.786	0.155531
653.268	0.156
653.75	0.156455
654.232	0.156976
654.715	0.157682
655.197	0.158658
655.679	0.159902
656.161	0.161316
656.643	0.162746
657.125	0.164061
657.607	0.165215
658.089	0.166256
658.571	0.167289
659.053	0.168405
659.536	0.169618
660.018	0.170848
660.5	0.171967
660.982	0.172863
661.464	0.173498
661.946	0.173921
662.428	0.174231
662.91	0.174521
663.393	0.174828
663.875	0.17512
664.357	0.175326
664.839	0.175387
665.321	0.175279
665.803	0.175019
666.285	0.174645
666.767	0.174181
667.25	0.173606
667.732	0.172839
668.214	0.171805
668.696	0.170555
669.178	0.169252
669.66	0.168023
670.142	0.166877
670.624	0.165735
671.106	0.164479
671.589	0.162995
672.071	0.161203
672.553	0.159101
673.035	0.156773
673.517	0.154362
673.999	0.152007
674.481	0.149785
674.963	0.147685
675.446	0.145634
675.928	0.143552
676.41	0.141397
676.892	0.139191
677.374	0.137001
677.856	0.134897
678.338	0.132913
678.82	0.131039
679.302	0.129231
679.784	0.127453
680.267	0.125696
680.749	0.123996
681.231	0.122408
681.713	0.120982
682.195	0.119736
682.677	0.118652
683.159	0.117688
683.641	0.116805
684.124	0.115977
684.606	0.115205
685.088	0.114494
685.57	0.113845
686.052	0.113231
686.534	0.112611
687.016	0.111937
687.498	0.111188
687.981	0.110386
688.463	0.10959
688.945	0.108882
689.427	0.108324
689.909	0.107933
690.391	0.107679
690.873	0.107494
691.355	0.107306
691.837	0.107066
692.32	0.106764
692.802	0.106426
693.284	0.106091
693.766	0.105786
694.248	0.105516
694.73	0.105263
695.212	0.105001
695.694	0.104719
696.177	0.104428
696.659	0.104156
697.141	0.103935
697.623	0.103777
698.105	0.103668
698.587	0.103568
699.069	0.103429
699.551	0.103218
700.033	0.102931
700.516	0.102592
700.998	0.102237
701.48	0.101899
701.962	0.101591
702.444	0.101308
702.926	0.101034
703.408	0.100757
703.89	0.100478
704.372	0.100212
704.855	0.0999763
705.337	0.0997765
705.819	0.0996023
706.301	0.0994265
706.783	0.0992197
707.265	0.0989619
707.747	0.0986528
708.229	0.0983083
708.712	0.0979503
709.194	0.0975912
709.676	0.0972266
710.158	0.0968368
710.64	0.0963986
711.122	0.0958966
711.604	0.0953321
712.086	0.0947208
712.568	0.0940839
713.051	0.093437
713.533	0.0927847
714.015	0.0921238
714.497	0.0914517
714.979	0.0907728
715.461	0.0901008
715.943	0.0894511
716.425	0.0888299
716.908	0.0882271
717.39	0.0876177
717.872	0.0869709
718.354	0.0862642
718.836	0.0854937
719.318	0.0846762
719.8	0.0838388
720.282	0.0830031
720.764	0.082173
721.247	0.0813344
721.729	0.080467
722.211	0.0795623
722.693	0.0786354
723.175	0.0777252
723.657	0.0768798
724.139	0.0761372
724.621	0.0755055
725.104	0.0749592
725.586	0.0744473
726.068	0.0739131
726.55	0.0733163
727.032	0.0726474
727.514	0.0719263
727.996	0.0711887
728.478	0.070468
728.96	0.0697811
729.443	0.0691249
729.925	0.0684833
730.407	0.067838
730.889	0.067181
731.371	0.0665171
731.853	0.0658621
732.335	0.0652342
732.817	0.0646474
733.299	0.0641076
733.782	0.063613
734.264	0.0631565
734.746	0.0627285
735.228	0.0623181
735.71	0.0619128
736.192	0.0614999
736.674	0.0610694
737.156	0.0606185
737.639	0.0601553
738.121	0.0596994
738.603	0.0592766
739.085	0.058909
739.567	0.0586058
740.049	0.0583572
740.531	0.0581357
741.013	0.0579052
741.495	0.0576318
741.978	0.0572937
742.46	0.0568871
742.942	0.0564224
743.424	0.0559176
743.906	0.0553917
744.388	0.0548608
744.87	0.0543387
745.352	0.0538401
745.835	0.053381
746.317	0.0529767
746.799	0.0526356
747.281	0.0523534
747.763	0.0521107
748.245	0.0518777
748.727	0.051623
749.209	0.0513249
749.692	0.0509801
750.174	0.0506055
750.656	0.050231
751.138	0.049889
751.62	0.0496017
752.102	0.0493756
752.584	0.0491985
753.066	0.0490455
753.548	0.0488851
754.03	0.0486867
754.513	0.0484261
754.995	0.0480889
755.477	0.0476725
755.959	0.0471881
756.441	0.0466614
756.923	0.0461307
757.405	0.0456404
757.888	0.0452299
758.37	0.044921
758.852	0.0447105
759.334	0.0445702
759.816	0.0444569
760.298	0.0443264
760.78	0.0441498
761.262	0.0439222
761.744	0.0436624
762.226	0.0434027
762.709	0.0431732
763.191	0.0429887
763.673	0.0428432
764.155	0.0427144
764.637	0.0425748
765.119	0.042404
765.601	0.0421966
766.083	0.041963
766.566	0.0417216
767.048	0.0414891
767.53	0.0412723
768.012	0.0410665
768.494	0.0408589
768.976	0.0406355
769.458	0.0403883
769.94	0.0401176
770.423	0.0398311
770.905	0.0395392
771.387	0.0392504
771.869	0.0389696
772.351	0.0386986
772.833	0.0384376
773.315	0.0381884
773.797	0.0379532
774.279	0.0377344
774.761	0.0375322
775.244	0.0373444
775.726	0.0371665
776.208	0.0369956
776.69	0.0368314
777.172	0.0366793
777.654	0.0365474
778.136	0.0364444
778.619	0.036374
779.101	0.0363328
779.583	0.0363095
780.065	0.0362877
780.547	0.0362495
781.029	0.036181
781.511	0.0360749
781.993	0.035932
782.475	0.0357587
782.957	0.0355655
783.44	0.0353638
783.922	0.0351645
784.404	0.0349765
784.886	0.0348059
785.368	0.0346559
785.85	0.0345266
786.332	0.0344155
786.814	0.0343187
787.297	0.0342314
787.779	0.0341494
788.261	0.0340686
788.743	0.0339858
789.225	0.0338979
789.707	0.0338025
790.189	0.0336982
790.671	0.0335857
791.154	0.0334694
791.636	0.0333568
792.118	0.0332571
792.6	0.0331782
793.082	0.0331236
793.564	0.0330906
794.046	0.0330707
794.528	0.0330531
795.01	0.0330287
795.493	0.0329943
795.975	0.0329536
796.457	0.0329168
796.939	0.0328954
797.421	0.0328979
797.903	0.0329262
798.385	0.0329746
798.867	0.0330313
799.35	0.0330821
799.832	0.0331146
800.314	0.0331201
800.796	0.0330944
801.278	0.033037
801.76	0.0329498
802.242	0.032836
802.724	0.0327016
803.206	0.0325556
803.688	0.0324102
804.171	0.0322805
804.653	0.0321803
805.135	0.0321202
805.617	0.0321057
806.099	0.0321368
806.581	0.0322091
807.063	0.0323151
807.545	0.0324452
808.028	0.0325879
808.51	0.0327296
808.992	0.0328552
809.474	0.0329496
809.956	0.0330006
810.438	0.0330037
810.92	0.0329644
811.402	0.0328983
811.885	0.032827
812.367	0.0327711
812.849	0.0327429
813.331	0.0327413
813.813	0.0327532
814.295	0.0327579
814.777	0.0327356
815.259	0.0326734
815.741	0.0325701
816.224	0.0324333
816.706	0.0322752
817.188	0.0321057
817.67	0.0319289
818.152	0.0317437
818.634	0.0315465
819.116	0.0313366
819.598	0.0311181
820.081	0.0308993
820.563	0.0306894
821.045	0.030494
821.527	0.0303132
822.009	0.0301409
822.491	0.0299697
822.973	0.0297945
823.455	0.0296162
823.937	0.0294422
824.42	0.0292837
824.902	0.0291509
825.384	0.0290493
825.866	0.0289775
826.348	0.0289285
826.83	0.0288918
827.312	0.0288587
827.794	0.0288235
828.277	0.0287855
828.759	0.0287476
829.241	0.0287149
829.723	0.0286921
830.205	0.0286838
830.687	0.0286931
831.169	0.0287219
831.651	0.0287702
832.133	0.0288354
832.615	0.0289113
833.098	0.0289887
833.58	0.0290568
834.062	0.0291057
834.544	0.0291304
835.026	0.0291313
835.508	0.0291144
835.99	0.0290883
836.472	0.0290597
836.955	0.0290313
837.437	0.0290004
837.919	0.028962
838.401	0.0289121
838.883	0.0288511
839.365	0.0287864
839.847	0.0287297
840.329	0.0286936
840.812	0.0286867
841.294	0.0287098
841.776	0.0287561
842.258	0.0288121
842.74	0.0288631
843.222	0.0288968
843.704	0.0289069
844.186	0.0288934
844.668	0.0288607
845.151	0.0288156
845.633	0.0287647
846.115	0.028713
846.597	0.0286636
847.079	0.0286182
847.561	0.0285778
848.043	0.0285433
848.525	0.0285159
849.008	0.0284977
849.49	0.0284916
849.972	0.0285022
850.454	0.0285353
850.936	0.0285967
851.418	0.0286911
851.9	0.0288195
852.382	0.0289781
852.864	0.0291573
853.347	0.0293424
853.829	0.0295164
854.311	0.0296637
854.793	0.0297734
855.275	0.0298424
855.757	0.0298758
856.239	0.0298858
856.721	0.029891
857.203	0.0299118
857.686	0.0299688
858.168	0.0300779
858.65	0.0302482
859.132	0.0304792
859.614	0.0307614
860.096	0.0310779
860.578	0.0314071
861.06	0.0317282
861.543	0.0320245
862.025	0.0322876
862.507	0.0325176
862.989	0.0327228
863.471	0.0329159
863.953	0.0331105
864.435	0.0333188
864.917	0.0335489
865.399	0.0338037
865.882	0.0340804
866.364	0.0343699
866.846	0.0346584
867.328	0.0349294
867.81	0.0351688
868.292	0.0353699
868.774	0.0355391
869.256	0.0356969
869.739	0.035874
870.221	0.0361032
870.703	0.0364078
871.185	0.0367936
871.667	0.0372472
872.149	0.0377398
872.631	0.0382397
873.113	0.0387236
873.596	0.0391859
874.078	0.0396395
874.56	0.0401082
875.042	0.040614
875.524	0.0411659
876.006	0.041755
876.488	0.0423585
876.97	0.0429488
877.452	0.0435063
877.934	0.0440272
878.417	0.0445231
878.899	0.045015
879.381	0.0455241
879.863	0.0460647
880.345	0.0466434
880.827	0.047262
881.309	0.0479236
881.791	0.0486357
882.274	0.0494092
882.756	0.0502526
883.238	0.051166
883.72	0.0521375
884.202	0.0531454
884.684	0.0541661
885.166	0.0551824
885.648	0.0561889
886.13	0.0571911
886.613	0.0581977
887.095	0.0592139
887.577	0.0602362
888.059	0.0612531
888.541	0.0622533
889.023	0.0632311
889.505	0.0641897
889.987	0.0651368
890.47	0.0660771
890.952	0.0670037
891.434	0.0678974
891.916	0.0687324
892.398	0.0694882
892.88	0.0701588
893.362	0.0707546
893.844	0.0712948
894.326	0.0717939
894.808	0.0722512
895.291	0.072648
895.773	0.0729552
896.255	0.0731496
896.737	0.0732274
897.219	0.0732087
897.701	0.0731287
898.183	0.0730225
898.665	0.0729088
899.148	0.0727829
899.63	0.072622
900.112	0.0723975
900.594	0.0720908
901.076	0.0717022
901.558	0.0712489
902.04	0.070755
902.522	0.0702398
903.005	0.0697095
903.487	0.069158
903.969	0.0685736
904.451	0.0679482
904.933	0.0672832
905.415	0.0665899
905.897	0.0658837
906.379	0.0651794
906.861	0.0644863
907.344	0.06381
907.826	0.0631547
908.308	0.0625267
908.79	0.0619335
909.272	0.0613814
909.754	0.060871
910.236	0.0603948
910.718	0.0599397
911.201	0.0594933
911.683	0.0590502
912.165	0.0586161
912.647	0.0582061
913.129	0.0578378
913.611	0.0575221
914.093	0.0572577
914.575	0.0570316
915.057	0.0568257
915.54	0.0566256
916.022	0.0564281
916.504	0.0562422
916.986	0.0560837
917.468	0.0559655
917.95	0.0558905
918.432	0.0558499
918.914	0.0558282
919.396	0.0558131
919.879	0.0558037
920.361	0.055813
920.843	0.0558633
921.325	0.0559755
921.807	0.0561601
922.289	0.0564123
922.771	0.0567151
923.253	0.0570487
923.736	0.0574004
924.218	0.0577701
924.7	0.0581681
925.182	0.0586062
925.664	0.0590884
926.146	0.0596039
926.628	0.0601297
927.11	0.0606386
927.592	0.0611111
928.075	0.0615417
928.557	0.0619388
929.039	0.0623175
929.521	0.0626894
930.003	0.0630571
930.485	0.0634147
930.967	0.063755
931.449	0.0640784
931.932	0.0643972
932.414	0.0647329
932.896	0.0651081
933.378	0.0655338
933.86	0.066005
934.342	0.0665011
934.824	0.0669959
935.306	0.0674708
935.788	0.0679233
936.271	0.068369
936.753	0.0688326
937.235	0.0693369
937.717	0.0698918
938.199	0.0704904
938.681	0.0711134
939.163	0.0717383
939.645	0.0723493
940.128	0.072942
940.61	0.0735226
941.092	0.074102
941.574	0.0746912
942.056	0.0752977
942.538	0.0759269
943.02	0.0765845
943.502	0.0772773
943.984	0.0780123
944.467	0.078793
944.949	0.0796165
945.431	0.0804741
945.913	0.0813556
946.395	0.0822562
946.877	0.0831808
947.359	0.0841434
947.841	0.0851597
948.323	0.0862376
948.806	0.087371
949.288	0.0885397
949.77	0.0897188
950.252	0.0908912
950.734	0.0920586
951.216	0.0932414
951.698	0.0944711
952.18	0.0957738
952.663	0.097158
953.145	0.09861
953.627	0.100102
954.109	0.101608
954.591	0.103117
955.073	0.104639
955.555	0.106198
956.037	0.107814
956.519	0.109492
957.002	0.111212
957.484	0.112941
957.966	0.11465
958.448	0.116331
958.93	0.118004
959.412	0.119706
959.894	0.121471
960.376	0.123314
960.859	0.125215
961.341	0.127132
961.823	0.129022
962.305	0.130859
962.787	0.132647
963.269	0.134418
963.751	0.136207
964.233	0.138037
964.716	0.139903
965.198	0.141782
965.68	0.143649
966.162	0.145494
966.644	0.147334
967.126	0.149206
967.608	0.151145
968.09	0.153171
968.572	0.155276
969.054	0.157442
969.537	0.159654
970.019	0.16192
970.501	0.164279
970.983	0.16678
971.465	0.169463
971.947	0.172331
972.429	0.17535
972.911	0.178467
973.394	0.181641
973.876	0.184872
974.358	0.188211
974.84	0.191739
975.322	0.195531
975.804	0.199617
976.286	0.203972
976.768	0.208527
977.25	0.213206
977.733	0.217971
978.215	0.22283
978.697	0.227834
979.179	0.233026
979.661	0.238406
980.143	0.243905
980.625	0.249402
981.107	0.254767
981.59	0.259911
982.072	0.264805
982.554	0.269468
983.036	0.27392
983.518	0.278139
984	0.282043
984.482	0.28552
984.964	0.288484
985.447	0.290929
985.929	0.292947
986.411	0.294687
986.893	0.296295
987.375	0.297848
987.857	0.299339
988.339	0.300705
988.821	0.301883
989.303	0.302873
989.785	0.303752
990.268	0.304645
990.75	0.305663
991.232	0.306848
991.714	0.308162
992.196	0.309513
992.678	0.310815
993.16	0.31205
993.643	0.313272
994.125	0.314582
994.607	0.316061
995.089	0.317712
995.571	0.319452
996.053	0.321149
996.535	0.322685
997.017	0.324026
997.499	0.325232
997.981	0.326419
998.464	0.32769
998.946	0.329065
999.428	0.330473
999.91	0.331786
1000.39	0.332896
1000.87	0.333778
1001.36	0.334518
1001.84	0.335268
1002.32	0.336164
1002.8	0.337268
1003.28	0.338531
1003.77	0.339838
1004.25	0.341074
1004.73	0.342191
1005.21	0.343242
1005.7	0.344338
1006.18	0.345588
1006.66	0.347031
1007.14	0.348617
1007.62	0.350248
1008.11	0.351837
1008.59	0.353381
1009.07	0.354964
1009.55	0.35672
1010.03	0.358752
1010.52	0.361063
1011	0.363543
1011.48	0.366015
1011.96	0.36832
1012.45	0.370401
1012.93	0.372321
1013.41	0.374222
1013.89	0.376231
1014.37	0.378379
1014.86	0.380583
1015.34	0.382682
1015.82	0.384532
1016.3	0.386091
1016.78	0.387442
1017.27	0.388746
1017.75	0.390144
1018.23	0.391684
1018.71	0.393291
1019.2	0.394821
1019.68	0.39615
1020.16	0.397264
1020.64	0.398269
1021.12	0.399337
1021.61	0.400604
1022.09	0.402092
1022.57	0.403687
1023.05	0.405201
1023.53	0.406485
1024.02	0.407512
1024.5	0.4084
1024.98	0.409344
1025.46	0.4105
1025.94	0.411887
1026.43	0.413369
1026.91	0.414717
1027.39	0.415724
1027.87	0.416318
1028.36	0.416584
1028.84	0.41671
1029.32	0.416857
1029.8	0.417064
1030.28	0.417215
1030.77	0.417099
1031.25	0.416519
1031.73	0.415403
1032.21	0.413822
1032.69	0.411938
1033.18	0.409889
1033.66	0.407703
1034.14	0.40528
1034.62	0.402461
1035.1	0.399138
1035.59	0.395341
1036.07	0.39125
1036.55	0.387119
1037.03	0.383166
1037.52	0.379484
1038	0.37603
1038.48	0.372685
1038.96	0.369352
1039.44	0.366039
1039.93	0.36287
1040.41	0.360036
1040.89	0.357698
1041.37	0.355912
1041.85	0.354621
1042.34	0.353693
1042.82	0.353013
1043.3	0.352554
1043.78	0.352389
1044.27	0.35265
1044.75	0.353438
1045.23	0.354747
1045.71	0.356448
1046.19	0.358338
1046.67	0.360224
1047.16	0.362015
1047.64	0.363748
1048.12	0.365542
1048.6	0.36751
1049.09	0.369671
1049.57	0.37192
1050.05	0.374077
1050.53	0.375973
1051.01	0.377536
1051.5	0.378818
1051.98	0.379946
1052.46	0.381024
1052.94	0.382049
1053.42	0.382896
1053.91	0.383374
1054.39	0.383324
1054.87	0.382717
1055.35	0.381665
1055.84	0.380357
1056.32	0.378952
1056.8	0.37749
1057.28	0.37587
1057.76	0.373915
1058.25	0.371469
1058.73	0.368484
1059.21	0.365038
1059.69	0.36127
1060.17	0.357292
1060.66	0.353119
1061.14	0.348666
1061.62	0.343822
1062.1	0.338542
1062.59	0.332908
1063.07	0.327127
1063.55	0.321448
1064.03	0.316069
1064.51	0.311056
1065	0.306347
1065.48	0.301801
1065.96	0.29729
1066.44	0.29277
1066.92	0.288294
1067.41	0.283981
1067.89	0.279932
1068.37	0.276187
1068.85	0.272698
1069.34	0.269369
1069.82	0.266111
1070.3	0.262894
1070.78	0.259751
1071.26	0.256753
1071.74	0.253953
1072.23	0.25134
1072.71	0.248843
1073.19	0.246355
1073.67	0.243793
1074.16	0.241136
1074.64	0.238431
1075.12	0.235758
1075.6	0.23318
1076.08	0.230702
1076.57	0.228269
1077.05	0.2258
1077.53	0.223235
1078.01	0.220576
1078.49	0.217888
1078.98	0.215271
1079.46	0.212807
1079.94	0.210525
1080.42	0.208397
1080.91	0.206364
1081.39	0.204378
1081.87	0.202441
1082.35	0.200604
1082.83	0.198944
1083.32	0.197523
1083.8	0.196353
1084.28	0.19539
1084.76	0.194561
1085.24	0.193797
1085.73	0.193069
1086.21	0.192394
1086.69	0.191814
1087.17	0.191362
1087.65	0.191037
1088.14	0.190798
1088.62	0.190587
1089.1	0.190367
1089.58	0.190147
1090.07	0.189983
1090.55	0.189946
1091.03	0.190086
1091.51	0.190398
1091.99	0.190822
1092.48	0.191269
1092.96	0.191669
1093.44	0.192005
1093.92	0.192324
1094.4	0.19271
1094.89	0.193232
1095.37	0.193915
1095.85	0.194717
1096.33	0.195555
1096.82	0.196349
1097.3	0.197058
1097.78	0.197699
1098.26	0.198329
1098.74	0.199004
1099.23	0.199739
1099.71	0.2005
1100.19	0.201217
1100.67	0.201824
1101.15	0.202292
1101.64	0.202644
1102.12	0.202929
1102.6	0.203188
1103.08	0.203424
1103.57	0.203589
1104.05	0.203615
1104.53	0.203449
1105.01	0.203089
1105.49	0.202588
1105.98	0.202023
1106.46	0.201455
1106.94	0.200893
1107.42	0.200286
1107.9	0.199553
1108.39	0.198628
1108.87	0.197488
1109.35	0.196166
1109.83	0.194721
1110.32	0.193195
1110.8	0.191584
1111.28	0.189829
1111.76	0.187852
1112.24	0.185589
1112.72	0.183034
1113.21	0.180238
1113.69	0.177288
1114.17	0.174263
1114.65	0.171211
1115.14	0.16814
1115.62	0.165038
1116.1	0.161906
1116.58	0.158778
1117.06	0.155721
1117.55	0.152811
1118.03	0.150104
1118.51	0.147613
1118.99	0.145306
1119.47	0.143127
1119.96	0.141022
1120.44	0.138963
1120.92	0.136948
1121.4	0.134992
1121.88	0.133096
1122.37	0.131238
1122.85	0.129368
1123.33	0.127427
1123.81	0.125377
1124.3	0.123212
1124.78	0.120964
1125.26	0.118685
1125.74	0.116421
1126.22	0.114193
1126.71	0.111996
1127.19	0.109808
1127.67	0.107614
1128.15	0.105418
1128.63	0.103249
1129.12	0.101148
1129.6	0.0991536
1130.08	0.0972826
1130.56	0.095531
1131.05	0.0938794
1131.53	0.092306
1132.01	0.0907981
1132.49	0.089355
1132.97	0.0879815
1133.46	0.0866792
1133.94	0.0854398
1134.42	0.0842464
1134.9	0.0830831
1135.38	0.0819462
1135.87	0.0808518
1136.35	0.0798324
1136.83	0.078926
1137.31	0.0781621
1137.8	0.0775515
1138.28	0.0770849
1138.76	0.076742
1139.24	0.0765041
1139.72	0.0763651
1140.21	0.0763349
1140.69	0.0764335
1141.17	0.0766792
1141.65	0.0770782
1142.13	0.0776201
1142.62	0.0782831
1143.1	0.079043
1143.58	0.0798836
1144.06	0.0808
1144.55	0.0817945
1145.03	0.0828659
1145.51	0.0840011
1145.99	0.0851731
1146.47	0.086349
1146.96	0.0875041
1147.44	0.0886335
1147.92	0.0897557
1148.4	0.0909029
1148.88	0.0921045
1149.37	0.093372
1149.85	0.094693
1150.33	0.0960397
1150.81	0.0973834
1151.3	0.0987118
1151.78	0.100033
1152.26	0.101369
1152.74	0.102738
1153.22	0.104139
1153.7	0.105551
1154.19	0.106937
1154.67	0.108267
1155.15	0.109531
1155.63	0.110744
1156.12	0.11193
1156.6	0.113103
1157.08	0.114247
1157.56	0.115313
1158.04	0.116235
1158.53	0.116954
1159.01	0.117442
1159.49	0.11771
1159.97	0.117793
1160.45	0.117723
1160.94	0.117509
1161.42	0.117124
1161.9	0.116519
1162.38	0.11565
1162.87	0.114496
1163.35	0.11307
1163.83	0.111409
1164.31	0.109548
1164.79	0.107505
1165.28	0.105277
1165.76	0.102848
1166.24	0.100213
1166.72	0.0973872
1167.2	0.0944113
1167.69	0.0913409
1168.17	0.0882267
1168.65	0.0851033
1169.13	0.0819863
1169.62	0.0788818
1170.1	0.0757977
1170.58	0.0727526
1171.06	0.0697751
1171.54	0.0668953
1172.03	0.0641346
1172.51	0.0614989
1172.99	0.0589802
1173.47	0.056565
1173.95	0.0542424
1174.44	0.0520122
1174.92	0.0498839
1175.4	0.0478721
1175.88	0.0459877
1176.37	0.0442328
1176.85	0.0426
1177.33	0.0410758
1177.81	0.0396467
1178.29	0.0383039
1178.78	0.0370451
1179.26	0.0358723
1179.74	0.0347872
1180.22	0.0337874
1180.7	0.0328647
1181.19	0.0320075
1181.67	0.0312043
1182.15	0.0304486
1182.63	0.0297403
1183.11	0.0290855
1183.6	0.0284926
1184.08	0.0279689
1184.56	0.0275184
1185.04	0.0271402
1185.53	0.0268352
1186.01	0.0266062
1186.49	0.0264583
1186.97	0.0263968
1187.45	0.0264241
1187.94	0.0265358
1188.42	0.0267197
1188.9	0.026958
1189.38	0.0272321
1189.86	0.0275292
1190.35	0.0278466
1190.83	0.0281914
1191.31	0.0285761
1191.79	0.0290117
1192.28	0.0295006
1192.76	0.0300349
1193.24	0.0305977
1193.72	0.0311694
1194.2	0.0317341
1194.68	0.0322823
1195.17	0.0328105
1195.65	0.0333165
1196.13	0.0337964
1196.61	0.0342425
1197.1	0.0346457
1197.58	0.0350001
1198.06	0.0353055
1198.54	0.0355671
1199.02	0.0357915
1199.51	0.0359809
1199.99	0.0361294
1200.47	0.0362235
1200.95	0.0362474
1201.43	0.03619
1201.92	0.0360495
1202.4	0.0358347
1202.88	0.0355599
1203.36	0.0352384
1203.85	0.0348771
1204.33	0.0344746
1204.81	0.0340231
1205.29	0.0335129
1205.77	0.0329374
1206.26	0.0322952
1206.74	0.0315902
1207.22	0.0308294
1207.7	0.0300219
1208.18	0.0291781
1208.67	0.0283114
1209.15	0.0274384
1209.63	0.0265789
1210.11	0.0257545
1210.6	0.0249845
1211.08	0.0242837
1211.56	0.0236601
1212.04	0.0231143
1212.52	0.0226422
1213.01	0.0222377
1213.49	0.0218966
1213.97	0.0216182
1214.45	0.0214052
1214.93	0.0212614
1215.42	0.0211881
1215.9	0.0211824
1216.38	0.0212376
1216.86	0.0213446
1217.35	0.0214965
1217.83	0.0216901
1218.31	0.0219264
1218.79	0.0222065
1219.27	0.022528
1219.76	0.0228818
1220.24	0.023252
1220.72	0.023621
1221.2	0.023974
1221.68	0.0243049
1222.17	0.0246171
1222.65	0.0249213
1223.13	0.0252306
1223.61	0.025555
1224.09	0.0258978
1224.58	0.0262558
1225.06	0.026621
1225.54	0.026984
1226.02	0.0273371
1226.51	0.0276755
1226.99	0.0279982
1227.47	0.0283066
1227.95	0.0286046
1228.43	0.0288979
1228.91	0.0291925
1229.4	0.0294931
1229.88	0.0298006
1230.36	0.0301113
1230.84	0.0304172
1231.33	0.0307086
1231.81	0.0309783
1232.29	0.0312244
1232.77	0.0314512
1233.26	0.0316652
1233.74	0.031871
1234.22	0.0320664
1234.7	0.0322408
1235.18	0.0323802
1235.66	0.0324726
1236.15	0.0325162
1236.63	0.0325218
1237.11	0.0325108
1237.59	0.0325077
1238.08	0.032532
1238.56	0.0325913
1239.04	0.0326812
1239.52	0.0327886
1240	0.0328996
1240.49	0.0330059
1240.97	0.0331079
1241.45	0.0332119
1241.93	0.0333264
1242.41	0.0334566
1242.9	0.0336023
1243.38	0.0337592
1243.86	0.0339223
1244.34	0.0340886
1244.83	0.0342583
1245.31	0.0344317
1245.79	0.0346055
1246.27	0.0347707
1246.75	0.0349132
1247.24	0.0350195
1247.72	0.035081
1248.2	0.0350995
1248.68	0.0350871
1249.16	0.0350613
1249.65	0.0350393
1250.13	0.0350323
1250.61	0.0350434
1251.09	0.0350695
1251.58	0.0351052
1252.06	0.0351467
1252.54	0.035194
1253.02	0.0352498
1253.5	0.0353168
1253.98	0.0353962
1254.47	0.0354865
1254.95	0.0355866
1255.43	0.0356969
1255.91	0.0358203
1256.4	0.0359608
1256.88	0.0361194
1257.36	0.0362916
1257.84	0.0364661
1258.33	0.0366281
1258.81	0.0367652
1259.29	0.036873
1259.77	0.0369571
1260.25	0.0370311
1260.73	0.0371088
1261.22	0.0371976
1261.7	0.0372936
1262.18	0.0373842
1262.66	0.0374535
1263.15	0.0374907
1263.63	0.0374949
1264.11	0.0374751
1264.59	0.037444
1265.07	0.0374128
1265.56	0.0373848
1266.04	0.037357
1266.52	0.0373233
1267	0.0372823
1267.48	0.0372399
1267.97	0.0372101
1268.45	0.0372087
1268.93	0.0372472
1269.41	0.0373266
1269.89	0.0374381
1270.38	0.0375668
1270.86	0.0376993
1271.34	0.0378289
1271.82	0.0379569
1272.31	0.0380879
1272.79	0.0382251
1273.27	0.0383643
1273.75	0.0384945
1274.23	0.0386029
1274.72	0.0386822
1275.2	0.0387361
1275.68	0.0387792
1276.16	0.0388323
1276.64	0.0389143
1277.13	0.039035
1277.61	0.0391915
1278.09	0.0393704
1278.57	0.0395535
1279.06	0.0397229
1279.54	0.0398655
1280.02	0.0399716
1280.5	0.0400338
1280.98	0.0400442
1281.47	0.0399971
1281.95	0.0398914
1282.43	0.0397346
1282.91	0.039544
1283.39	0.0393418
1283.88	0.0391496
1284.36	0.0389809
1284.84	0.0388384
1285.32	0.0387153
1285.81	0.0386025
1286.29	0.0384956
1286.77	0.0384004
1287.25	0.0383316
1287.73	0.0383064
1288.22	0.0383375
1288.7	0.0384262
1289.18	0.0385628
1289.66	0.0387326
1290.14	0.0389235
1290.63	0.0391322
1291.11	0.0393646
1291.59	0.0396294
1292.07	0.0399308
1292.56	0.0402621
1293.04	0.0406063
1293.52	0.0409421
1294	0.0412553
1294.48	0.0415451
1294.96	0.0418263
1295.45	0.0421233
1295.93	0.0424601
1296.41	0.0428498
1296.89	0.0432919
1297.38	0.0437742
1297.86	0.0442816
1298.34	0.0448045
1298.82	0.0453421
1299.3	0.0459019
1299.79	0.0464919
1300.27	0.0471163
1300.75	0.047773
1301.23	0.0484567
1301.71	0.0491643
1302.2	0.0498994
1302.68	0.0506705
1303.16	0.0514865
1303.64	0.0523493
1304.13	0.0532499
1304.61	0.0541716
1305.09	0.0550976
1305.57	0.0560205
1306.05	0.0569467
1306.54	0.0578925
1307.02	0.0588733
1307.5	0.0598914
1307.98	0.0609305
1308.46	0.0619598
1308.95	0.0629471
1309.43	0.0638731
1309.91	0.0647391
1310.39	0.065563
1310.88	0.0663662
1311.36	0.0671577
1311.84	0.0679255
1312.32	0.0686386
1312.8	0.0692593
1313.29	0.0697607
1313.77	0.0701367
1314.25	0.0703994
1314.73	0.0705663
1315.21	0.0706465
1315.7	0.0706335
1316.18	0.07051
1316.66	0.0702604
1317.14	0.0698846
1317.62	0.0694033
1318.11	0.0688527
1318.59	0.0682713
1319.07	0.0676847
1319.55	0.0670999
1320.04	0.0665091
1320.52	0.0659017
1321	0.0652763
1321.48	0.0646448
1321.96	0.0640279
1322.45	0.0634455
1322.93	0.062908
1323.41	0.0624134
1323.89	0.0619521
1324.38	0.0615166
1324.86	0.0611109
1325.34	0.0607526
1325.82	0.0604663
1326.3	0.0602729
1326.79	0.0601775
1327.27	0.0601667
1327.75	0.0602123
1328.23	0.060286
1328.71	0.0603711
1329.2	0.0604705
1329.68	0.0606015
1330.16	0.0607832
1330.64	0.061021
1331.12	0.0612983
1331.61	0.0615793
1332.09	0.0618231
1332.57	0.0619999
1333.05	0.0621017
1333.54	0.0621405
1334.02	0.0621365
1334.5	0.0621033
1334.98	0.0620381
1335.46	0.0619232
1335.94	0.0617355
1336.43	0.0614605
1336.91	0.0611015
1337.39	0.0606803
1337.87	0.0602271
1338.36	0.0597686
1338.84	0.0593168
1339.32	0.0588682
1339.8	0.0584116
1340.28	0.0579405
1340.77	0.0574593
1341.25	0.056979
1341.73	0.0565076
1342.21	0.056044
1342.69	0.0555787
1343.18	0.0551007
1343.66	0.0546053
1344.14	0.0541013
1344.62	0.0536097
1345.11	0.0531565
1345.59	0.0527623
1346.07	0.0524332
1346.55	0.0521595
1347.03	0.0519228
1347.52	0.051707
1348	0.0515088
1348.48	0.0513416
1348.96	0.0512297
1349.44	0.0511967
1349.93	0.051253
1350.41	0.0513899
1350.89	0.0515839
1351.37	0.0518069
1351.86	0.0520393
1352.34	0.0522767
1352.82	0.0525282
1353.3	0.0528068
1353.78	0.0531172
1354.27	0.0534492
1354.75	0.0537795
1355.23	0.0540831
1355.71	0.0543465
1356.19	0.0545744
1356.68	0.0547861
1357.16	0.0550023
1357.64	0.0552317
1358.12	0.0554644
1358.61	0.0556751
1359.09	0.0558361
1359.57	0.0559317
1360.05	0.0559682
1360.53	0.0559728
1361.02	0.0559831
1361.5	0.0560294
1361.98	0.0561187
1362.46	0.0562299
1362.94	0.0563285
1363.43	0.0563916
[truncated: 5,469 more rows]
